# Supplementary material for: Hybrid-Lambda: A low specific rating rotor concept for offshore wind turbines
Source: Copernicus journal article supplement (doi:10.5194/wes-2023-72), 2023-07-17
Supplement: Supplementary file [file wes-2023-72-AC1-supplement.pdf]

1 Dear Amy Robertson,

2 We have the pleasure of submitting our revised paper "Hybrid-Lambda: A low specific  
3 rating rotor concept for offshore wind turbines" (wes-2023-72) for consideration in the  
4 journal Wind Energy Science.

5 We are very grateful for the constructive feedback with lots of valuable suggestions  
6 from the editorial team and the reviewers which helped to improve our paper. In  
7 short, we want to highlight the major changes and additions:

- 8 • Design and optimization flow chart (Fig. 3.)
- 9 • Additional study on applying the *Hybrid-Lambda* control strategies to a  
10 conventionally upscaled rotor (Fig. 9)
- 11 • Additional study on components costs and LCOE in addition to COVE (Fig. 20  
12 and 21)
- 13 • Revision of Fig. 15, now showing absolute loads for all DLCs
- 14 • Restructuring and better explaining the concept of peak shaving, the transition  
15 between the TSRs and the twist offset (Sect. 2.1 and 3.2)
- 16 • Added a plot to compare the stiffness and mass distribution along the blade  
17 span with the reference turbine (Fig. 13)

18 Furthermore, we have made all the necessary requested changes, and have  
19 addressed all comments of the reviewers (printed in black) in the detailed response  
20 below.

21 **Our responses to the referees are written in green.**

22 **Reformulated or added phrases for the revised manuscript are cited with blue fonts.**

23 Line, figure and table numbers in our answers are according to the revised  
24 manuscript. Line, figure and table numbers in the referees' comments are according  
25 to the initial manuscript. All new and updated figures are appended to this authors'  
26 response.

27 We feel that based on the reviewers comments our paper has been sharpened and  
28 improved, especially in terms of clarity, readability and additional considerations, and  
29 now meets the required standards to be published. If any responses are unclear, or if  
30 you wish for additional changes, please let us know.

31 Sincerely,

32 Daniel Ribnitzky

33 - On behalf of all authors -

34 **Referee 1:**

35 ***General comments***

36 The manuscript addresses the philosophy and methodology for rotor re-design to  
37 achieve a turbine that is better suited for electricity markets with high wind-energy  
38 penetration. Subsequently, the methodology is applied, and the resulting example  
39 design is evaluated on main performance indicators. The research is well motivated  
40 and introduced, with a clear description of the objectives. The main design philosophy  
41 is clearly argued and described. However, the methodology has a few complicated  
42 aspects that are challenging to understand. Particularly the aspect of pitching and how  
43 that influences the design of the inner blade section requires very much attention  
44 from the reader to grasp and only emerges gradually throughout the story. Likewise,  
45 which variables are optimised and how is not described in one place. In my opinion,  
46 the manuscript would benefit from restructuring this, for which I have some  
47 suggestions below, under 'Specific comments'. The results are interpreted fairly, with  
48 sufficient criticism, properly supporting the final conclusions.

49 On the principal criteria for WES publications, I would evaluate this manuscript with:

50 Scientific significance: Excellent

51

52 Scientific quality: Mostly excellent to good, and fair for the treatment of  
53 transition/pitch/optimisation

54

55 Presentation quality: Mostly good, for a challenging topic to explain, and again fair  
56 for the treatment of transition/pitch/ optimisation

57 Although a rather extensive section with specific comments follows, I would like to  
58 stress that I find the research very valuable and very well executed. I just want to share  
59 my ideas with the authors to stimulate them to see the work from a slightly different  
60 perspective. I'm happy with whichever way they use this information.

61 We thank the reviewer for the comprehensive, yet positive and encouraging feedback.  
62 We feel that the paper essentially improved by clearly marking the design variables  
63 and providing an overview of the design process with Fig. 3. We further improved the  
64 description of peak shaving and the twist offset and how this influences the blade  
65 design, as described below in more detail.

66 ***Specific comments***

67 **Design philosophy and methodology (of aerodynamic design and control)**

68

69 I apologise up front for the lengthy discussion of this aspect. However, the authors  
70 know how many variables interact in the performance of a rotor, let alone in its design,  
71 and they have ample experience in trying to convey that to others. My struggle to

72 provide clarity here will probably resemble theirs, so I hope this gives me some  
73 leniency.

74 There are a few aspects of the descriptions of the design that I found difficult to follow.  
75 For instance, several design choices are explained and motivated during the execution  
76 of the design activities, while they are already touched upon earlier in the description  
77 of the methodology. There turns out to be a strong relation between the final control  
78 philosophy and the aerodynamic design for low-TSR / strong winds. However, this  
79 control philosophy only becomes clear in section 3.2, while several references to its  
80 consequences are already used in the descriptions and clarifications in chapter 2 (e.g.  
81 lines 122-132, 152-160) and section 3.1 (e.g lines 221, 250-252).

82 Currently, the rotor design methodology starts with the principle of having three  
83 regions: a light wind / high TSR region, a strong wind / low TSR region and a peak  
84 shaving region (which is introduced on line 119, without explicitly describing how peak  
85 shaving is done). At this point, the reader perceives these regions as being fully  
86 separated. During the transition from light winds to strong winds the TSR and the  
87 induction drop instantaneously, so the RBM drops instantaneously as well. Therefore,  
88 pitching would only need to be applied at even stronger winds, when the (separate)  
89 peak-shaving region starts. This would allow for a straightforward design of the inner  
90 blade for zero pitch and at the optimal AoA, for low TSR. This is also how it is described  
91 in figure 1, right (apart from the dual goal for the induction factor).

92 However, the final control philosophy introduces a longer transition, due to the choice  
93 of keeping rotational speed constant in a transition region (rather than reducing it  
94 instantaneously). Consequently, the blade needs to be pitched in the transition region,  
95 and the pitch angle in the strong-wind region is no longer zero. Inherently, the  
96 transition region is extended by this up to wind speeds where peak shaving is needed.  
97 Therefore, there is no 'clean' strong-wind / low-TSR region, but this region is  
98 immediately combined with peak shaving. It also seems that the term peak shaving is  
99 often used loosely, to imply both control regions 2.2 and 2.3. As seen in figure 6, in  
100 the strong-wind / low-TSR region the blade is not at constant pitch, so there are no  
101 'unique' design conditions for the aerodynamic design for this region (i.e. with  
102 constant TSR and constant pitch). These differences with the primary philosophy  
103 explained in relation to figure 1 where initially very confusing to me.

104 We added a paragraph in Sec 2.1 to clearly address that switching between the  
105 operating modes is realized by a continuous reduction in TSR. We further clarified that  
106 a reduction in TSR alone is not enough to limit the loads and properly defined the  
107 term peak-shaving:

108 The transition between the operating modes introduces a new control region since  
109 the switching of the TSR is not a sudden change rather than a continuous reduction  
110 in TSR. In this paper, it is realized with a constant rotational speed (rpm) in region 2.2  
111 as shown in Fig. 2. The reduction in TSR alone (with a constant rpm) is not enough to  
112 limit the loads. On the contrary, it is part of the design methodology to combine a

113 reduction in TSR and pitching to feather for load limitation as further analysed in Sec.  
114 3.1. Consequently, the so-called strong wind mode cannot be described with a  
115 constant pitch angle. With increasing wind speed the pitch angle is gradually increased  
116 towards feather to limit the flapwise RBM. This action will be referred to as peak-  
117 shaving in the following.

118 It stands to reason that an extended transition region is beneficial. Without it, the drop  
119 in TSR will be accompanied with a drop in BRM, but also a drop in power. Most likely,  
120 power can be maximised in a transition region, if the BRM remains at its constraint.  
121 This can be achieved with 1. constant speed and pitching (as chosen), 2. constant  
122 (zero) pitch and a gradual reduction in rotational speed, or 3. a combination of speed  
123 and pitch changes. Choosing for one of the first two (simpler) options is reasonable.  
124 Unfortunately, this kind of logic using the level of system parameters is not provided.  
125 Instead, the more complicated, implicit evaluation of the effect of speed and pitch on  
126 load distribution is given (later), leaving it up to the reader to judge if this achieves the  
127 desired global behaviour.

128 We thank the referee for these additional ideas on how to perform the transition  
129 between the operating modes. We added a paragraph about these options in Sec. 2.1.  
130 In fact, we ran optimization routines (in steady and uniform inflow and with rigid  
131 structures) to find the best combination of TSR and pitch in the transition region (and  
132 up to rated wind speed), that constrain the maximum flapwise RBM and maximize the  
133 power output. We did not address this solution in the paper since the advantages in  
134 terms of power output were only marginal.

135 Note, that the transition of TSRs could also be realized in different ways (e.g. reduction  
136 or gentle increase in rpm). In fact, the optimal combination of TSR and pitch for the  
137 transition region can be found by constraining the flapwise RBM and searching for the  
138 optimum in the power coefficient. These optimization routines resulted in a gently  
139 increasing rpm until rated wind speed. However, for all wind speed bins, the increase  
140 in the power output was never larger than 0.5 % of rated power compared to the  
141 constant rpm solution presented here. Consequently, the aforementioned alternative  
142 for the transition region is not presented in this paper.

143 For better understanding of this approach, I recommend moving at least the top-left  
144 of figure 6, to section 2.1. This speed control is so straight-lined, that it seems to be  
145 more like a pre-meditated aspect of the design methodology than a consequence of  
146 the execution of a design iteration. This graph will help understanding of many  
147 aspects of section 2.1 that are currently unclear. Understandably, the authors did  
148 learn from their early design experiments for the tuning of this graph (such as the  
149 onset of the speed reduction at 15 m/s), but the same applies to the a-priori choice  
150 of TSR 9 and 11. I think it is also necessary to already explain the consequence of this  
151 speed control for the extent of the transition region, for pitch control, for the non-zero  
152 pitch of the low-TSR design and for the non-constant pitch in strong winds (during  
153 low-TSR operation in region 2.3). A schematised version of the bottom-left of figure 6  
154 could be used for that as a qualitative pre-analysis. The shapes of the curve can easily

155 be described with qualitative arguments for all regions. As a follow up of this  
156 description, it can then be clarified that the inner blade section is designed for a  
157 different/non-zero pitch angle and how that pitch angle will be determined during the  
158 design process. It would help to add this change in design pitch-angle to figure 1.

159 We agree that the rotational speed schedule is important for understanding the  
160 following design steps and moved Fig. 2 to Sec. 2.1, as suggested.

161 Although the previous description is reverse engineered from the manuscript, I'm  
162 fairly sure this captures (part of) the rationale of the authors. The concurrent change  
163 of TSR (for constant-speed operation) and pitch angle, will therefore naturally lead to  
164 the effects described in figures 4 and 5. As such, those graphs could support the  
165 choice for constant speed plus pitch increase, instead of constant pitch with speed  
166 reduction. However, the bottom-up approach that starts with the graphs in figures 4  
167 and 5 and ends with exactly constant speed operation is neither convincing nor clear.  
168 If the authors agree with (some of) this analysis, I suggest that they restructure the  
169 story along similar lines of reasoning.

170 We agree that cause, reason and prerequisites were not always clearly separated and  
171 indicated in the initial manuscript. We therefore moved the description of the  
172 rotational speed schedule up front to Sec. 2.1, as suggested. The additional changes  
173 to the manuscript are printed in the two answers above.

174 Up to this point, I agree with the overall philosophy for design and operation. On top  
175 of this, the authors introduce two aspects, which I'd like them to either reconsider, or  
176 support more clearly. These aspects are the twist offset towards stall for the inner  
177 blade and the dual goal for its induction factor (0.33 in high-TSR operation and 0.21 in  
178 low-TSR operation). I will start with the dual goal for induction, as this is easier to  
179 address. The principle of the design is to provide power by the outer blade section in  
180 light winds, to reduce loads on this section in strong winds and to let the inner section  
181 take over power production in strong winds. Power production in strong winds is  
182 considered to be important for offshore wind turbines, since these have a high  
183 probability of occurrence. Hence the interest of the authors in good peak-shaving  
184 performance. All these intentions, given by the authors, are counteracted by  
185 prioritising the induction factor optimisation of the inner blade for power production  
186 in light winds. As above, I would agree if the authors used an analysis of what happens  
187 to the induction factor as argument for the choice of a constant speed-increasing pitch  
188 transition: if the inner blade section is designed for an induction factor of 0.21 with a  
189 positive pitch angle, then it will have a higher induction factor at zero pitch and high  
190 TSR, which is a welcome advantage. This advantage is again a natural consequence of  
191 the pitch and TSR actions. The need to fine-tune this with a dedicated design for an  
192 induction factor of 0.33 in off-design operation is insufficiently argued.

193 The referee is correct in her/his description of the dual goal for the induction factor of  
194 the inner blade section. In fact, the blade design for the inner section is driven by two  
195 objectives. First, a traditional axial induction factor distribution of constant 0.33, as

196 the aerodynamic optimum for power production in light winds (high TSR, fine pitch of  
197  $-0.8^\circ$ ). And second, a low induction rotor design of around 0.21 with decreasing axial  
198 induction factor towards the tip in strong winds (low TSR, positive pitch) for load  
199 reduction. For power maximization in light winds both parts (inner and outer blade  
200 section) are important. While in strong winds first of all the inner part is important,  
201 since the outer part does not contribute much anymore to the power production and  
202 the loads. This somehow delicate design compromise is definitely not achievable with  
203 a conventional rotor design and the fact that we could achieve it already explains how  
204 we “integrate the application of peak shaving into the design process” which was also  
205 questioned in other comments by the referees. We added a justification to the  
206 description of the light wind mode in Sec. 2.1:

207 The inner part of the rotor operates like a conventional rotor with an axial induction  
208 factor close to 0.33. This is chosen in order to maximize the power output in light  
209 winds. But the reader should bear in mind that this part is not operating at its design  
210 point, as it is designed for a lower TSR of 9.

211 Then, the twist offset. If I’m correct, this offset is relative to its optimal AoA in low-TSR  
212 operation, although that conflicts with the information in figure 1. Also here, in terms  
213 of design philosophy this doesn’t make sense in a first-order rationale: The primary  
214 goal for the inner blade is power production in strong winds, so a compromise of the  
215 design for low-TSR operation should be very strongly supported.

216 Here we at least partly disagree with the referee. Yes, the twist offset is applied relative  
217 to the optimal AoA in the low-TSR operation. The twist offset defines the difference in  
218 the axial induction factor between the light and strong wind mode for the inner blade  
219 section, as well as the resulting pitch angles in the strong wind mode (e.g. how much  
220 we need to pitch to limit the loads). In fact, the pitch angle of  $2.2^\circ$  at  $v_{shift,end}$  almost  
221 perfectly counterbalances the twist offset of  $-2.5^\circ$ . Hence, the inner part of the blade  
222 operates in it’s optimal AoA (at this wind speed) and we don’t see a conflict with Fig. 1.  
223 We further have a different view on the described “primary goal for the inner blade”.  
224 The design is highly driven by compromise findings and the goals can’t always be  
225 categorized into primary and secondary. We would rather like to highlight the equality  
226 of the two objectives: Power maximization in light winds by a drastic increase in rotor  
227 diameter and limitation of the loads in strong winds with reduced power losses.

228 Furthermore, I’d like to go into the description of the effects of the twist offset, that  
229 are used to argue its need. In much of the operational region of the aerofoils, the lift  
230 coefficient depends nearly linearly on the AoA. Thus, pitching is almost equally  
231 effective with and without the twist offset. Likewise, the effect of changing TSR on the  
232 change in lift coefficient over the blade span (relating to figure 4) is hardly dependent  
233 on a twist offset, since it is an effect on inflow angle: the change in AoA is not affected  
234 by an offset. Furthermore, for the system-level phenomena that are discussed, the  
235 optimality of the AoA hardly matters, so the offset of the twist is effectively relative to  
236 an arbitrary AoA. This also makes the discussion in lines 294-299 confusing or even  
237 misleading: Optimum AoA only tells something about the lift over drag ratio. For this

238 special design and for the many off-design conditions (dual TSRs, transition pitching  
239 and peak-shaving pitching) it doesn't tell anything about the bigger picture for  
240 induction, power coefficient or thrust coefficient. Because of the operation at high TSR  
241 (with zero pitch) and at low TSR (with positive pitch), both the inner blade section and  
242 outer blade section have fundamentally two operating AoAs. I would be more  
243 concerned about how these two points are situated in the region between maximum  
244 lift coefficient/stall and minimum/negative lift. If the margins to those are good, then  
245 I would prioritise the optimum AoA under the principal design conditions (inner: low  
246 TSR – outer: high TSR) and not the off-design conditions (inner: high TSR).

247 The twist offset indeed introduces very complex effects on the blade design, the  
248 aerodynamics and the resulting control strategy. We apologize if this was not clearly  
249 discussed in the paper and we tried to improve the comprehensibility in the revised  
250 manuscript. But, we also want to clarify that the optimality of the AoA (lift to drag ratio)  
251 indeed does matter. As described in Burton et al. (2011) (Fig. 3.26 in chapter 3.7.5.)  
252 the lift to drag ratio has a non-neglectable influence on the power coefficient. The  
253 referee is correct in stating that pitching changes the lift coefficient equally,  
254 independent of the “starting-AoA”, since the behaviour is linear throughout the  
255 operating range. But, it is not equally effective (e.g. how much do we lose in terms of  
256 power coefficient) since there is a difference if you pitch away from the optimum lift  
257 to drag ratio or towards the latter. By introducing the twist offset it is possible to pitch  
258 the blade to feather (for load reduction) while increasing the lift to drag ratio for the  
259 inner blade section (keeping the aerodynamic performance high). With that we  
260 realized exactly what the referee suggested: “*prioritise the optimum AoA under the  
261 principal design conditions (inner: low TSR – outer: high TSR)*”. This can be seen in Fig. 8  
262 for the angle of attack in strong wind mode. Here, also the stall angle and the angle  
263 for the maximal lift to drag ratio is indicated. We agree, that part of the mentioned  
264 benefits (e.g. the change in the AoA distribution) could also be realized without the  
265 twist offset, just using the reduction in TSR and pitching to feather. At the end, the  
266 twist offset is also a tool to tune the difference in the axial induction factor between  
267 the light and strong wind mode for the inner blade section and allows to use smaller  
268 chord lengths. This further leads to a more slender, lighter and possibly cheaper  
269 blade. We reformulated the last paragraph in Sec. 2.1 to address the advantages of  
270 the twist offset more clearly:

271 Furthermore, we design the blade in a way that peak shaving is applied more  
272 efficiently. The inner section is designed with a twist offset towards stall. This comes  
273 with several advantages. The inner section does not operate in the design point in the  
274 low wind regime. As it is twisted towards stall and operated at a higher TSR than it was  
275 designed for, a fairly conventional induction factor of 0.33 can be reached, which leads  
276 to an increase in the power coefficient in the low wind regime. The angle for the twist  
277 offset is derived iteratively in stationary blade element momentum (BEM) simulations  
278 to reach the desired axial induction factor of 0.33 in the inner section at the high TSR.  
279 Using the twist instead of the chord length as a tool for this increase in the axial  
280 induction factor allows to use smaller chord lengths which leads to more slender,

281 lighter and possibly cheaper blades. Hence, the twist offset defines the difference of  
282 the axial induction factor between the light and strong wind mode for the inner part  
283 of the blade and it further influences the pitch angle at  $v_{shift,end}$  that is needed to limit  
284 the loads. In fact, the pitch angle of  $2.2^\circ$  at  $v_{shift,end}$  almost perfectly counterbalances  
285 the twist offset of  $-2.5^\circ$ . Hence, the inner part of the blade operates in its optimal lift  
286 to drag ratio at this wind speed, although the entire blade is already pitched to feather  
287 for load reduction. When peak shaving is applied, pitching shifts the inner section to  
288 operate at its aerodynamic optimum rather than moving away from it. It reaches its  
289 design point (an induction factor of 0.21 at the low TSR), which is beneficial for load  
290 reduction. In contrast, the outer section is now operated in a “pitched-to-feather-  
291 condition” and is greatly relieved. The limits to this methodology are negative lift and  
292 the stall angle. The latter is also plotted in Fig. 8.

293 I concur that the authors might prove to be correct in their arguments for deviation  
294 from the first design principles, to fine-tune the performance. However, there is so  
295 much going on, that I don't think it helps understanding the fundamentals. Obviously,  
296 the design principles of the Hybrid-lambda rotor can be combined with other  
297 philosophies, such as induction reduction towards the tip. However, a separation of  
298 effect would be beneficial for obtaining better insights. Induction reduction is here  
299 primarily achieved by the Hybrid-lambda design, and secondarily by the inner section  
300 design adaptations. Possibly, the authors already have experimented with the  
301 straightforward design approach and have found it to lead to unacceptable  
302 behaviour. In that case, it would be helpful to describe that more explicitly.

303 Thank you for the suggestion. Indeed, we tried to separate the effects as best as  
304 possible to identify the potential of each design decision (e.g.: Using a step-wise  
305 distribution with only two TSRs, rather than a continuous change in TSR; Separating  
306 aerodynamic and elastic effects at first; Separating instationary effects and the  
307 influence of controller tuning; etc.). However, we did not want to further complicate  
308 the reading by describing several design versions of the Hybrid-Lambda rotor (there  
309 were definitely many versions developed on the long path to the final design  
310 presented here). To provide a clear reference we introduced the scaled conventional  
311 blade which uses simple peak-shaving (only pitching to feather to limit the loads), as  
312 printed in line 369.

### 313 **Optimisation procedure**

314  
315 The design methodology (chapter 2) describes how the blade is designed for a  
316 particular rotor diameter and doesn't describe if and how rotor diameter is  
317 optimised. Rotor diameter also doesn't appear as design variable in the optimisation  
318 methodology (of section 2.3), where these variables are declared on lines 175-176.

319 Section 2.3 describes the methodology for the structural design and optimization and  
320 the aeroelastic investigations. The rotor radius is not mentioned here since this is  
321 analysed in the previous aerodynamic design step. The design flow chart (added to



322 Sect. 2.1 of the revised manuscript and additionally displayed in the appendix of this  
323 authors' response) will help to clarify our workflow. We added to the beginning of  
324 Sec. 2.3:

325 To further investigate the feasibility of the Hybrid-Lambda Rotor we develop a  
326 structural model for the blade. The workflow described in this section is carried out  
327 after freezing the design output-variables rotor radius and the chord and twist  
328 distribution. A link back to the aerodynamic optimization was only performed for a  
329 few major design versions, as indicated in Fig. 3.

330 Perhaps what is described there is a nested optimisation (inner level), but that is not  
331 described. As it is, the value of 326 m for rotor diameter on line 216 comes out of  
332 the blue. Similarly, it isn't clarified in the methodology how the spanwise transition  
333 point will be determined. The effect of both variables is discussed later (lines 254-  
334 280), which implies that they are also design variables (according to line 213). It  
335 would be helpful to know in advance how these design variables are incorporated in  
336 the methodology.

337 We want to give the reader an impression of the size of the rotor up-front. We tried to  
338 keep the description of the methodology (chapter 2) as general as possible in order  
339 to provide a design idea that can be adopted to different wind turbine design  
340 problems (see lines 100-104). Starting with the results in chapter 3, we are explicitly  
341 explaining the concept on the basis of the worked-out example (15 MW, 326 m  
342 diameter). The effect of the rotor radius (and specific rating) is described later in lines  
343 279-294. The effect of the spanwise transition point is discussed in lines 296-304. We  
344 believe it is meaningful to provide the reader with a short overview first (mentioning  
345 radius and spanwise transition point) and then explaining the effects later in the same  
346 section (3.1). We added a paragraph to the beginning of chapter 3 in order to clarify  
347 this:

348 In this chapter, we focus on the given use-case of the 15 MW offshore wind turbine,  
349 no longer generalizing the concept, in order to simplify the understanding. This means  
350 only one specific turbine diameter is presented here, although the influence of the  
351 rotor radius as a design variable was investigated and is further described below. We  
352 first address the resulting blade design and the influence of certain design variables.  
353 Table 2 summarizes general turbine parameters. The second part deals with loads,  
354 axial induction, angle of attack and power generation under steady and uniform  
355 inflow conditions. This is followed by the results of the structural design and the aero-  
356 servo-elastic investigations.

357 Along similar lines, lines 78-79 describe that the objective function (implied: for rotor  
358 optimisation) is COVE. However, the optimisation of the tower is only described later.  
359 It is not clear whether this tower optimisation is included in a global exploration or  
360 nested optimisation in this optimisation of COVE.

361 We clarified this in the design flow chart. The objective function for the blade  
362 structural optimization is COVE, as stated in line 213. The objective function for the  
363 tower design is the combined structural mass of tower and monopile, which is  
364 mentioned in line 228.

365 On line 178, a stall margin is introduced as a constraint for the optimisation. It is not  
366 clear how this is implemented, since the aerodynamic design methodology doesn't  
367 (explicitly) accommodate that.

368 We further explained the stall margin constraint:

369 Constraints for the optimization process are tip deflection, blade eigenfrequencies  
370 (must be above the rated blade passing frequency, 3P), the strains in the spar caps  
371 and a stall margin. The latter would only be active if the change in the airfoil position  
372 leads to an operating angle of attack larger than the stall angle of the respective airfoil  
373 (chord and twist are not optimized in this structural design step).

374 Line 180 states that this optimisation is done for a wind speed of 6.9 m/s, but it is not  
375 clear to the reader how this can be known. The wind speed at which the light-wind  
376 mode ends even seems to be a consequence of the optimisation itself, considering its  
377 dependence on rotor diameter.

378 Although the rotor diameter is not a free design variable in the structural optimization,  
379 the wind speed  $v_{shift,start}$  is explicitly calculated for every design iteration in WISDEM  
380 (with the code changes applied by the authors). We added this description to the  
381 methodology:

382 For each iteration the schedule of rpm, pitch, power, thrust and flapwise RBM over  
383 wind speed is re-calculated. The considered load case for the constraints is a steady  
384 inflow at the strongest wind speed in the light wind mode  $v_{shift,start}$ , as calculated for  
385 each design iteration (in this case  $v = 6.9 \frac{m}{s}$ ,  $TSR = 11$ ,  $\beta = -0.8^\circ$ ).

386 All in all, I was somewhat confused about which aspects were optimised in a numerical  
387 optimisation, which aspects were determined in an analytic design approach and  
388 which aspects were designed with the authors in the loop. Relating to that, it wasn't  
389 always clear in which order the various design variables were fixed. It would be helpful  
390 to clarify that in the beginning, perhaps with a flow chart of the entire process. In  
391 addition, it would help to categorise the variables in table 2 (fixed/chosen, design  
392 variables, properties, ...). In the results, I propose to start with the discussion of rotor  
393 diameter and spanwise transition (lines 254-280), since these are two high-level  
394 system parameters.

395 We thank the referee for the idea of a design flow chart. We added this to the revised  
396 manuscript for further clarification (see also the appendix of this authors' response).  
397 We further added a description of the design flow chart to line 153:

398 The overall design and optimization workflow is illustrated in Fig. 3. The process can  
399 be explained in four steps: An aerodynamic blade optimization, an aero-structural  
400 optimization of the blade, a structural optimization of the tower and the aero-servo-  
401 elastic simulations. In the first step (aerodynamic optimization) the design variables  
402 are the transition point between the inner and outer blade section, the design TSRs,  
403 the design axial induction factors, the twist offset and the design angle of attacks.  
404 Once a reasonable design is established the influence of the rotor radius is  
405 investigated. In the second step (the aero-structural optimization) the design variables  
406 are the airfoil positions and the spar cap thickness. When this step is converged the  
407 aerodynamic optimization is re-calculated once with the new airfoil positions. As a  
408 third step the tower and monopile are optimized for a fixed rotor design. The resulting  
409 turbine design is then investigated in aero-servo-elastic simulations.

410 We further classified the variables in table 2 to highlight the differences between  
411 optimized design parameters and predefined parameters. When explaining the effect  
412 of certain design variables in lines 278-317, we changed the order as proposed.

## 413 Results

414

415 The design is assessed on AEP, revenue and COVE. Although the design is intended to  
416 advance from LCOE optimisation, it would be interesting to add how well the new  
417 design and reference perform on that metric. This would help understand to which  
418 extent the new design is a conventional improvement on LCOE, and which part can  
419 be attributed to the adaptation to the market conditions. This is similar to the  
420 comparison between AEP and revenue, which is already made. In addition, it might be  
421 useful to show and discuss some cost results separately, and not only hidden inside  
422 COVE.

423 We included the LCOE in Fig. 20 and added:

424 This figure also includes the LCOE to give an insight on how much of this reduction  
425 can be attributed to cost and AEP optimization versus the adaption of the market  
426 conditions.

427 We further corrected a typo in the legend in Fig. 20:

428 ~~Optimized blade design~~ Initial blade and tower design

## 429 Discussion

430

431 There are good messages in the discussion. I would recommend discussing only  
432 aspects that are closely related to the proposed concept and the results of this study.  
433 Adding other concepts/technologies (such as actuators and bend-twist coupling) is not  
434 specific to this concept (or at least it isn't argued why a combination would be of more  
435 interest than for conventional designs). There are numerous other concepts that  
436 could otherwise be named as well.

437 We used the description of additional actuators and the accompanying disadvantages  
438 to highlight the benefits of the Hybrid-Lambda rotor. We further like to mention the  
439 bend-twist coupling since we believe that including blade torsion to the simulation  
440 model only makes sense with a substantial redesign of the blade twist, accounting for  
441 and counterbalancing the blade torsion. We therefore decided to keep these  
442 descriptions in lines 752-757 and 767-771.

443 In my opinion, the generalisation of the method to continuous variable-TSR operation  
444 (with variable spanwise induction optimisation) is the most interesting part of the  
445 discussion. It could be considered to dive a little deeper into this.

446 Our idea was to distribute the design TSR over the blade length with a continuous  
447 function. This could enable three advantages. First, the steep gradient in the blade  
448 design (twist and chord) would be reduced which simplifies the structural design.  
449 Second, the axial induction and angle of attack distribution would be smoother. Steep  
450 gradients might lead to additional trailing vortices and a continuous distribution might  
451 be beneficial. Third, since lowering the operational TSR is a continuous control action  
452 there would always be some part of the blade operating in its design point. The further  
453 the operational TSR is reduced, the further this part would move along the blade  
454 towards the root. Like this, one could generalize the concept to a continuous TSR  
455 reduction towards rated wind speed, not using distinct light and strong wind modes  
456 anymore. Since all these thoughts and ideas are speculations so far and we couldn't  
457 find the time to implement such a design idea, we decided to not further explain the  
458 idea in the paper. We will keep it in mind for further publications.

## 459 **Conclusions**

460  
461 On line 710-713 you state that peak shaving is integrated into the design process. As  
462 you have seen in my earlier comments, I found this part somewhat confusing. I  
463 struggled with the use of the term peak shaving for both the transition region and for  
464 the conventional peak-shaving region. Furthermore, the bottom-up argumentation  
465 for the chosen control was difficult to follow. It didn't give a reproducible procedure  
466 to merit the name 'integration in the design process'. To claim this integration, I would  
467 like to see at least a stricter process for this particular part of the design approach,  
468 such as could be given with a flow chart, a formal optimisation problem description  
469 or graphs with dependencies on relevant design variables. As outlined above, in my  
470 opinion you provide arguments for a sensible choice of operation in the transition  
471 region, but that wouldn't go as far as a design process. As it is, you only show one  
472 design point, with only circumstantial evidence that it provides superior performance  
473 thanks to the claimed mechanisms. Perhaps a similar combination of speed and pitch  
474 control can achieve similar performance for peak shaving with a conventional rotor  
475 design.

476 Having said that, the conclusions provide a concise overview of the relevant insights  
477 that have been achieved with this research.

478 It is one key aspect of the proposed design methodology to consider the fact that the  
479 blade will be pitched to feather before rated power is reached to limit the loads. Since  
480 the blade designer knows this already, it should be integrated in the blade design  
481 process beforehand. We agree that we didn't provide a clear evidence in the paper,  
482 about how this is done. We further thank the referee for the idea of comparing the  
483 performance with a conventional blade where both, pitch and TSR, are optimized  
484 when peak shaving is applied. We carried out an additional study and applied similar  
485 control optimization strategies to the scaled version of the IEA 15 MW turbine. This  
486 breaks up to what extent the improvements result from the change in the control  
487 strategy and to what extent from the integration in the blade design. We added the  
488 results to Fig. 9 and added a descriptive paragraph:

489 The green dashed line indicates the power curve of the reference blade that is  
490 geometrically scaled by the same factor and conventional peak shaving is applied to  
491 limit the flapwise RBM. This means only the pitch angle is set to a higher value to  
492 constrain the flapwise RBM while the rpm follows the design TSR. In contrast, the black  
493 dotted line represents the same blade (geometrically scaled IEA 15 MW) but peak  
494 shaving is applied in a similar manner as for the Hybrid-Lambda Rotor. This means  
495 for  $v > v_{shift,start}$  the rpm is kept constant until the operational TSR is reduced from 9  
496 to 7. For  $v > v_{shift,end}$  the rpm schedule follows the TSR of 7 which is an arbitrary  
497 choice in this case and should be optimized in a detailed design study. In addition, the  
498 pitch angle is set for  $v > v_{shift,start}$  in order to limit the flapwise RBM. In short, we are  
499 applying the Hybrid-Lambda control strategy to a conventional blade design. The  
500 results show that the power output can be greatly increased if the TSR is lowered in  
501 region 2.2 and 2.3 (compare green dashed and black dotted line in Fig. 9). Thus, peak  
502 shaving should not only be accomplished by increasing the pitch angle, but also by  
503 optimizing the operational TSR with respect to the load constraint (as also indicated  
504 by Madsen et al. (2020)). Since the results show that a reduction of the operational  
505 TSR is beneficial in the peak shaving region it makes sense to account for this fact  
506 already in the blade design which is integrated in the Hybrid-Lambda design  
507 methodology. Indeed, the Hybrid-Lambda Rotor enables even lower power losses in  
508 the peak shaving region since the TSR reduction is already accounted for in the blade  
509 design (compare solid red and dotted black line in Fig. 9). The turbine concept reaches  
510 its rated power at  $10.2 \text{ m s}^{-1}$ , which is  $0.4 \text{ m s}^{-1}$  lower than the reference turbine.

#### 511 **Smaller comments about the content (in order of appearance)**

- 512 • On line 53 a similar design philosophy from Wobben is mentioned. This is  
513 later discussed on line 656, where it becomes clearer in which sense that  
514 philosophy differs. It could be useful to clarify this already in the  
515 introduction.

516 We moved the description to the introduction, as proposed:

517 This concept follows the objective of reducing unintended stall effects on the blade of  
518 a variable-speed turbine in gusty winds. It was not used to enable large rotors with  
519 low specific ratings, as pointed out with the *Hybrid-Lambda* concept.

520 • Line 64 (and many other places): The authors use 'zero pitch' for the operation  
521 of the blade at design conditions. This is implicitly defined on line 64. However,  
522 many blade designers and control designers define the structural twist with  
523 respect to zero twist at the tip and then use something like 'fine pitch' to get  
524 the design twist at the tip. Thus, this offsets the definition of pitch from the one  
525 used in this manuscript. It seems that even the authors confused themselves  
526 about this, since figure 6, bottom-left, shows a negative pitch angle for high-  
527 TSR operation. The chosen definition could be made more explicit (and used  
528 consistently).

529 The term zero pitch should indicate only that the pitch angle is at zero degrees. In  
530 many blade design studies the so called fine pitch, that leads to the maximum power  
531 coefficient at design TSR, can deviate slightly from zero degrees, as it does in our  
532 study. We clarified this, using the term "zero pitch" only if zero degrees are meant and  
533 using "fine pitch" when the pitch for optimal  $c_p$  is meant. We added to the description  
534 of Fig. 2:

535 From  $4 \text{ m s}^{-1}$  on, the rotor operates at the high TSR of 11 in the light wind mode and  
536 a fine pitch angle of  $-0.8^\circ$  which leads to the maximum power coefficient. This pitch  
537 angle is called fine pitch since the pitch angle for optimal  $c_p$  was derived after the  
538 blade design was concluded.

539 • Line 257-258: The sentence 'If ... reached' is not so clear.

540 We added the respective control region numbers for clarification:

541 If the rotor radius is enlarged, the power output is increased before the limiting loads  
542 are reached (e.g., in region 1 and 2.1). But at higher wind speeds, when peak shaving  
543 is applied (in region 2.2 and 2.3), the blade must be pitched further and power losses  
544 are more pronounced.

545 • The authors claim on lines 319-320 that the reduced thrust coefficient leads to  
546 much lower wake losses. This cannot be known, since the effect of increased  
547 rotor diameter cannot be ignored. The increase in rotor diameter will extend  
548 the wake over longer distances and over a wider area. The next sentence  
549 implies that actually more momentum is taken from the wind.

550 We addressed the wake losses of the *Hybrid-Lambda Rotor* in a separate publication,  
551 which is accepted but not published yet (Ribnitzky, Bortolotti, Branlard, Kühn: *Rotor  
552 and wake aerodynamic analysis of the Hybrid-Lambda concept - an offshore low-specific-  
553 rating rotor concept*, JoP conference series, 2023). Results show an increased power  
554 output on a two-turbine set-up even though the rotor radius is enlarged and even in

555 a scenario of constant absolute spacing (compared to the IEA 15 MW). We added the  
556 citation:

557 The wake losses of the Hybrid-Lambda rotor are addressed by Ribnitzky et al. (2023).  
558 Results show significant advantages even in a scenario with constant absolute spacing  
559 (compared to the IEA 15 MW reference turbine).

- 560 • Lines 353-362: Does Wisdem take the special care that is meant here? For  
561 instance, this region would experience stress concentration. Is that accounted  
562 for? Otherwise, the reduction in spar-cap thickness could be more related to  
563 model simplification than to optimisation.

564 *PreComp* estimates equivalent sectional inertia and stiffness properties for 2D cross  
565 sections with the help of a modified classic laminate theory. It's not a 3D finite element  
566 model, hence gradients in the stiffness distribution in blade spanwise direction are  
567 not considered. However, for each cross section realistic stiffness properties are  
568 derived and the resulting material stresses are calculated. We further added the  
569 stiffness distribution and compared it to the IEA 15 MW (as requested by the second  
570 referee). We added a note to the manuscript:

571 Here, the reader should bear in mind that the structural solver *PreComp* is a 2D cross  
572 sectional solver and does not account for stress concentration due to rapid changes  
573 in the geometry in span wise direction.

- 574 • Lines 388-390: This description is ambiguous. In region 2.3 the blade has  
575 variable pitch, so there is no unique  $c_p$  for this region. Could this be clarified?

576 This is correct,  $c_p$  is changing with the wind speed in region 2.3. But, from steady state  
577 simulations the desired  $c_p$  is known as a function of wind speed (or in the given case  
578 of eq. 6, as a function of rotational speed). We added the dependency in the equation  
579 and added:

580 
$$M_g = \frac{\pi R^5 \rho c_p(\omega)}{2\lambda^3} \omega^2$$

581 Note, that there is no constant  $c_p$  in region 2.3 since the pitch angle is a function of  
582 wind speed. Hence, the desired  $c_p$  from steady state simulations is implemented as a  
583 function of rotational speed.

- 584 • Lines 400-402: It is described that a conventional look-up table was not found  
585 to perform sufficiently well. Could it be clarified whether this means that  
586 something else has been implemented? This seems to be the implication, since  
587 this section is about the controller design, and not about its evaluation.  
588 Therefore, this doesn't seem to be simply an observation of performance, but  
589 a reason for change.

590 We implemented two versions of the controller. The advanced controller with the load  
591 feedback was only applied for the investigations in Sec. 3.4.2. We clarified this by  
592 describing and naming both controller versions:

593 For the pitch controller two versions are implemented. The first version is referred to  
594 as simplified controller and implements the transition of the TSR and a look up table  
595 for the pitch signal for regions 2.2 and 2.3. This simplified controller is used for the  
596 load case calculations in Sec 3.4.3. A second version is developed that features a  
597 feedback from the flapwise RBMs, further referred to as load feedback controller and  
598 it is applied in Sec. 3.4.2.

599 • Lines 403-404: Could the authors explain what is meant by 'minimal' and  
600 'reduce' compared to what? The previous descriptions of prescribed pitch do  
601 not seem to relate to the region where RBM load control is needed, or is it  
602 (dynamically)? The later text (lines 412-413) implies that 'minimal' refers to the  
603 steady-state pitch angle that was previously discussed. It would be helpful to  
604 get this information first. Having said that, lines 457-459 state that this  
605 controller is not used. Therefore, I would recommend removing this entire  
606 description of the (dynamic) load controller.

607 As discussed above, the load feedback controller is used in Sec. 3.4.2 and should  
608 therefore be described in the manuscript. Although there is a mismatch with the line  
609 numbers the authors are guessing that the term "minimal pitch" is causing confusion.  
610 We therefore changed the naming to reference pitch, which is meant to be the output  
611 signal of the controller. We further added the controller region numbers where the  
612 load limiter is usually active.

613 Thirdly, in parallel to these two functionalities, we implemented a load limiter (for  
614 region 2.2 and 2.3). (...) As long as the RBM feedback is larger than the constraint, the  
615 reference pitch value (output of the controller) is increased, thus not allowing the  
616 blades to reduce its pitch angles, which would further increase the RBMs. The change  
617 of the reference pitch angle is proportional to the difference between the RBM  
618 feedback and the constraint.

619 • Lines 468-470: Are the 'quasi-steady loads' determined by dynamic simulation  
620 with uniform and constant wind speed? That is not the same as quasi-steady  
621 (even though the outcome might be similar). Could the procedure for this  
622 assessment be described with a little bit more detail?

623 This term describes simulations with steady and uniform inflow, steady state  
624 operation (steady pitch and rotational speed), including elastic deformations on the  
625 turbine structure. As also suggested by referee No. 2, we changed the wording to  
626 "steady-uniform inflow loads".

627 • Lines 478-480: This statement seems to contradict the earlier description. Does  
628 this only apply to the tip deflection? Why wouldn't the same argument apply to  
629 flapwise RBM and thrust?



630 Indeed, we investigated two wind speeds ( $v_{rated}$  and  $v_{shift,start}$ ) for the steady-inflow  
631 cases and choose to display the more severe load case. For the flapwise RBM it doesn't  
632 matter since the load level is the same for the two wind speeds as defined by the  
633 design methodology. For the edgewise RBM, the thrust and the tower base bending  
634 moments it is the load case at  $v_{rated}$ . For the tip-to-tower-clearance it is  $v_{shift,start}$ . We  
635 clarified this in the revised manuscript:

636 First, the white bars illustrate the maximum loads under steady and uniform inflow  
637 including elastic deformations. Two wind speeds (rated and  $v_{shift,start}$ ) were  
638 investigated and the more severe case is displayed here.

- 639 • Lines 487-488: This describe the normalisation of the loads. It doesn't mention  
640 that a different normalisation is used for operational load cases and storm load  
641 cases. It would be useful to mention this up front, to avoid confusion with  
642 interpretation of the results later. This use two different normalisation values  
643 might even be reconsidered, even though I can see arguments for its use.  
644 Nevertheless, in the discussion and conclusions the authors now need to warn  
645 the reader that values for operational load cases and storm load cases cannot  
646 be compared directly. On line 678, they state that this is due to using relative  
647 values, but it is actually due to using different reference values for each.

648 We see the disadvantages of using normalized load levels and choose to display only  
649 absolute values for both, the *Hybrid-Lambda Rotor*, as well as for the reference turbine.  
650 The updated Fig. 15 (appended to this authors' response) now includes more  
651 information about the distinctive load levels. We further decided to show the tip-to-  
652 tower-clearance instead of the out-of-plane deflections since this variable is more  
653 design driving. The descriptive parts in the manuscript (Sect. 3.4.3) are updated  
654 respectively.

655 Figure 15 presents the ultimate loads of the *Hybrid-Lambda Rotor* with solid bars and  
656 those from the reference turbine with hatched bars. Three groups are distinguished  
657 by their texture. First, the white bars illustrate the maximum loads under steady and  
658 uniform inflow including elastic deformations. Two wind speeds (rated and  $v_{shift,start}$ )  
659 were investigated and the more severe case is displayed here. Second, the grey bars  
660 show the theoretical load increase according to the generic scaling law as described  
661 by Gasch and Twele (2012), which would apply to a geometrically scaled reference  
662 turbine without changing the aerodynamic concept (e.g. scaling the steady-inflow  
663 loads of the IEA 15 MW, displayed with white hatched bars). (...) The unloaded tip-  
664 to-tower-clearance scales with  $n$ , too (neglecting gravitational effects). Thus, the  
665 loaded tip-to-tower clearance scales with  $n$  as it is the difference of two  
666 variables, both scaling with  $n$  (the unloaded tip-to-tower clearance and the  
667 maximum tip deflection with the blade in front of the tower). These scaling  
668 factors are only an indication for the upper bound since the design  
669 methodology of the *Hybrid-Lambda Rotor* includes peak shaving with a constant

670 flapwise RBM. Third, the coloured columns relate to the dynamic load  
671 quantities from aero-servo-elastic simulations. (...)

672 The tip-to-tower-clearance represents a reserve, thus a higher value indicates  
673 a safer design. Note, that the unloaded tip-to-tower clearance also increased  
674 as documented in Table 2. The loaded tip-to-tower-clearance is larger for the  
675 *Hybrid-Lambda Rotor* in steady-uniform inflow as expected by the scaling law.  
676 (...)

677 The objective of the *Hybrid-Lambda Rotor* is to limit the stationary flapwise RBM  
678 to the maximum value of the reference turbine in steady-inflow BEM  
679 simulations. Thus, it is of special interest how much this type of loading  
680 increases in transient aeroelastic simulations. The ultimate load from normal  
681 power production is indeed marginally increased compared to the load level of  
682 the reference turbine from normal power production. But, if compared to the  
683 load level of the reference turbine under extreme wind shear events, the  
684 increase is only marginal.

685 • Lines 500-501, 504-505, (680-682,) 734 and 738: It is stated that the increase in  
686 DLC 6.3 is significant compared to the reference turbine. If I'm correct, this is  
687 confusing if not misleading, since DLC 6.3 is not assessed for the reference  
688 wind turbine. After this observation of increased loading, it is nevertheless  
689 claimed that the slender blade design shows benefits (= load reduction?) in  
690 storm events. This is also confusing. Perhaps it is meant that the increase in  
691 loading is not as large as it would have been in case no slender blade design  
692 was used. However, this is not what is compared here (a Hybrid-lambda rotor  
693 and a conventionally upscaled rotor). Along similar lines, on line 738, it is  
694 concluded that the Hybrid-lambda rotor shows advantages in reducing loads.  
695 Especially here, out of context, this seems somewhat misleading. In absolute  
696 sense, the loads are not reduced. I probably agree with the point that might  
697 have been intended, if it is about combating the load increase with the design.  
698 Could this be rephrased?

699 As we show absolute values in the revised manuscript the addressed paragraphs are  
700 rephrased. It now also gets clear, that the flapwise RBM increases for the storm events  
701 compared to the reference turbine, but the absolute values are still below the load  
702 level from DLC 1.5 and 1.6.

703 • Lines 522-525: I agree with the effect of the longer tower (higher lever arm, for  
704 almost equal thrust). However, the second argument seems flawed to me. Soft  
705 towers have a lower dynamic amplification factor for excitation frequencies  
706 that are above the natural frequency. They can have larger displacements with  
707 the same or even lower (internal) moments, which is why they are 'soft' (low  
708 stiffness). Thus, the effect of softness is more complicated and can go either  
709 way (depending on the excitation frequencies).

710 We thank the referee for the rectification and removed the respective sentences:

711 The tower base fore-aft bending moment is increased for the *Hybrid-Lambda Rotor* in  
712 the dynamic load cases although it is constant for the steady-inflow cases which  
713 highlights the importance of investigating transient effects. ~~The necessarily longer  
714 tower and heavier tower top mass result in lower eigenfrequencies and the tower is  
715 in general softer compared to the reference turbine. This leads to larger tower top  
716 deflections in gust events like extreme wind shear. The larger tower top movements  
717 result in higher tower base bending moments which might be mitigated by advanced  
718 control applications.~~

- 719 • Lines 574-576: This statement seems in line with visual observations from the  
720 graph. However, the lever arm is increased for the Hybrid-lambda rotor, while  
721 it decreases for the reference turbine. Doesn't that correspond to an increased  
722 contribution of the outer part?

723 We agree that ideally one would see a decrease in the non-dimensional lever arm also  
724 for the *Hybrid-Lambda Rotor*. However, we would like to put emphasis on the reduced  
725 loading and reduced load overshoot during the transient event. We changed the  
726 wording accordingly:

727 For the *Hybrid-Lambda Rotor*, the characteristic kink in the force distribution leads to  
728 lower maximum out-of-plane forces per unit length, even in the transient case. The  
729 non-dimensional lever arm is only slightly increased during the event and still much  
730 lower than for the reference turbine.

731 ~~This shows that the low induction design of the outer part of the blade contributes  
732 less to the overshoot in the flapwise RBM.~~

- 733 • Line 595: I suggest removing the reference to the aspect of market value here.  
734 At this point (the model for) market value is not yet introduced to the reader.

735 As suggested, we removed the aspect of the market value from this paragraph since  
736 it is further mentioned in line 673.

737 Figure 19 shows the gross energy yield per wind speed bin together with the Weibull  
738 distribution of the cluster-wake affected reference site ~~and the market value of wind  
739 power.~~

- 740 • Line 611-612: To some extent the limitation of the flapwise RBM will oppose  
741 this effect of geometric scaling. Although I agree that the mass will increase  
742 stronger than for the Hybrid-lambda rotor, it doesn't seem fair to model the  
743 structure of the Hybrid-lambda rotor and only hypothesise for more  
744 conventional scaling. Furthermore, line 359 states that the mass of the new  
745 blade is only 14% lighter than that of a scaled blade. Is 14% considered to be  
746 'strongly increased'?

747 Since this paragraph is about AEP and revenue and not about blade mass and costs,  
748 we removed the argument using the blade mass.

749 Considering the cluster-wake affected wind speed distribution, the AEP can be  
750 increased by 3% and the economic revenue by 4%. ~~At first glance, this increase seems~~  
751 ~~small. One should however consider that a geometrical up-scaling would strongly~~  
752 ~~increase the blade mass and the blade loads. Therefore this is not regarded as a~~  
753 ~~realistic alternative to the Hybrid-Lambda Rotor.~~

754 

- Figure 18: Why are results shown for the non-optimised tower? The optimised  
755 design seems to be the only sensible design, which fulfils the constraints with  
756 the actual (quasi-steady) loads.

757 We apologize for the typo in the legend of Fig. 20. What is compared here is the IEA  
758 15 MW, the initial blade and tower design and the optimized blade and tower design.  
759 Thus, this graph should highlight how much of the benefits result from the application  
760 of the "raw" *Hybrid-Lambda* design methodology and how much it can further be  
761 improved by the structural optimization. As suggested in a previous comment, we  
762 further added LCOE to the Figure.

### 763 **Technical corrections**

764 

- Overall: 'Sec.', 'Sect.' and 'section' are used, without consistency. Same for  
765 'Fig.' and 'Figure'.

766 We follow the author guidelines for WES journal papers (<https://www.wind-energy-science.net/submission.html>):  
767

768 <Cite>

769 *"The abbreviation "Fig." should be used when it appears in running text and should be*  
770 *followed by a number unless it comes at the beginning of a sentence, e.g.: "The results are*  
771 *depicted in Fig. 5. Figure 9 reveals that..."*

772 *The abbreviation "Sect." should be used when it appears in running text and should be*  
773 *followed by a number unless it comes at the beginning of a sentence.*

774 <end cite>

775 We corrected the abbreviation Sec. to Sect.

776 

- Line 135: Considering line 175-176, probably 'adjusted' is meant here. 'Adopt'  
777 implies that it is kept the same (in dimensionless spanwise coordinates).  
778 Alternatively, it could have been meant that the same 'order' was adopted,  
779 instead of the distribution.

780 The airfoil distribution is adopted (kept the same in dimensionless spanwise  
781 coordinates) in a first step and then optimized in the structural optimization process.

782 As the *Hybrid-Lambda Rotor* is compared with the IEA 15 MW reference turbine, the  
783 same airfoil family is used and the airfoil distribution along blade span is adopted in  
784 a first step. The airfoil position is later optimized as described in Sect. 2.3.

785 • Line 170: The use of 'maximum' is confusing here (especially for a low-  
786 induction rotor, which doesn't operate at maximum power coefficient in  
787 design conditions). Is it meant at TSR 11 (and at which pitch)?

788 We are referring to the maximum power coefficient for the given turbine design over  
789 all TSR and pitch (in this case at TSR=11 and at fine pitch=-0.8°).

790 The wind speed at which the transition from the light wind to the strong wind mode  
791 should start is calculated first. This is done by finding the operational point at  
792 maximum power coefficient for the given turbine design (at  $TSR = 11$  and *fine pitch* =  
793  $-0.8^\circ$ ) when the limiting flapwise RBM is first reached.

794 • Line 187: 'choice for' would be more appropriate than 'assumption of'. The  
795 authors are not addressing an unknown aspect here.

796 As the main focus of this paper is the aerodynamic rotor concept, the simple  
797 ~~assumption~~ choice of a monopile foundation was made ...

798 • Line 201: 'planed' -> 'planned'.

799 ... further simulations are ~~planned~~ planned using ...

800 • Line 213 and 215: 'blade design' -> 'aerodynamic blade design'.

801 • Line 220-221: 'which ... moments' would be more appropriate as an  
802 argument on line 151.

803 • Line 273: Probably 'that' is meant, instead of 'which'.

804 Incorporated the demanded changes from the three mentioned bullet points.

805 • Line 228 (Heading section 3.3): It is not the 'model' that is designed and  
806 optimised.

807 Changed the heading to:

808 Optimization of the structural blade and tower design

809 • Line 357: 'up' -> 'down'.

810 Thank you for pointing out this typo. We incorporated this important detail.

811 • Line 530: 'The unsteady event [add: starts after 200 seconds and] lasts for 12  
812 seconds, ...'.

813 The unsteady event starts at 200 seconds and lasts for 12 seconds with a maximum  
814 wind speed at the top of the rotor disc after 6 seconds.

815 **Referee 2:**

816 The manuscript presents a design and optimization methodology for a novel wind  
817 turbine rotor concept the authors call 'Hybrid-Lambda'. The work aims to a design  
818 rotor where (i) the outer part of the rotor is set to be optimal at low wind speeds  
819 operating at high TSR, and the inner part is designed for higher wind speeds at a lower  
820 TSR, and (ii) the increased loads are managed through a peak shaving controller close  
821 to rated conditions. The authors target to achieve this while constraining the mean  
822 blade flapwise bending moment loads below the max value of the reference turbine  
823 (IEA 15MW). As stated by the authors, the economic motivation for the design is to  
824 take advantage of energy pricing at low-wind conditions.

825 The work presented is scientifically significant and proves to challenge the  
826 conventional design of horizontal axis wind turbine rotors. The motivation and  
827 objectives of the work is presented clearly. But when presenting the methodology and  
828 results the ideas/concepts/fundamentals are difficult to follow. I do acknowledge that  
829 the body of work presented here is immense and there are a lot of moving parts to  
830 the novel rotor design. Light restructuring of concepts will help the readers appreciate  
831 the value of the manuscript. As an example, moving the controller strategy outlined  
832 in section 3.2 and figure 6 to line-125 would strengthen Section 2.

833 We thank the referee for the constructive and positive feedback.

834 We moved Fig. 2 to Sect. 2 and added two descriptive paragraphs to Sect. 2.1 to  
835 explain the rotational speed schedule and the peak shaving up front.

836 The transition between the operating modes introduces a new control region since  
837 the switching of the TSR is not a sudden change rather than a continuous reduction  
838 in TSR. In this paper, it is realized with a constant rotational speed (rpm) in region 2.2  
839 as shown in Fig. 2. The reduction in TSR alone (with a constant rpm) is not enough to  
840 limit the loads. On the contrary, it is part of the design methodology to combine  
841 pitching to feather and a reduction in TSR for load limitation as further analysed in  
842 Sec. 3.1. Consequently, the so-called strong wind mode cannot be described with a  
843 constant pitch angle. With increasing wind speed the pitch angle is gradually increased  
844 towards feather to limit the flapwise RBM. This action will be referred to as peak-  
845 shaving in the following.

846 Note, that the transition of TSRs could also be realized in different ways (e.g. reduction  
847 or gentle increase in rpm). In fact, the optimal combination of TSR and pitch for the  
848 transition region can be found by constraining the flapwise RBM and searching for the  
849 optimum in the power coefficient. These optimization routines resulted in a gently  
850 increasing rpm until rated wind speed. However, for all wind speed bins, the increase  
851 in the power output was never larger than a tenth of a Megawatt compared to the  
852 constant rpm solution presented here. Consequently, the aforementioned alternative  
853 for the transition region is not presented in this paper.

854 Overall, the manuscript is well structured and provides significant work that will be  
855 valuable to the broader wind energy community. Detailed comments and minor  
856 corrections are shared below:

857 Detailed Comments:

858 1. Section 1, line 58-59: Similarity to Wobben's work is presented, but it is not clear  
859 how the current work differentiates from itself until section 4. Please include  
860 details on how this work sets itself apart from previous works in the  
861 introduction.

862 We moved the description to the introduction, as proposed.

863 This concept follows the objective of reducing unintended stall effects on the blade of  
864 a variable-speed turbine in gusty winds. It was not used to enable large rotors with  
865 low specific ratings, as pointed out with the *Hybrid-Lambda* concept.

866 2. Section 1, line 63-64: I do not agree with the terminology "zero pitch" used in-  
867 lieu of "fine pitch". Typically, the blade tip is set to a pitch angle of zero and is a  
868 reference orientation for the geometric twist of the blade. "Fine Pitch" is the  
869 additional pitch offset added during operation such that the tip of the blade is  
870 at the optimal design twist. Please make the necessary changes here and  
871 through the manuscript.

872 We added the definition of the term fine pitch and made the necessary changes  
873 throughout the manuscript. The term zero pitch should indicate only that the pitch  
874 angle is at zero degrees. In many blade design studies the so called fine pitch, that  
875 leads to the maximum power coefficient at design TSR, can deviate slightly from zero  
876 degrees, as it does in our study. We clarified this and added to the description of Fig. 2:

877 From  $4 \text{ m s}^{-1}$  on, the rotor operates at the high TSR of 11 in the light wind mode and  
878 a fine pitch angle of  $-0.8^\circ$  which leads to the maximum power coefficient. This pitch  
879 angle is called fine pitch since the pitch angle for optimal  $c_p$  was derived after the  
880 blade design was concluded.

881 3. Section 2.1, line 119-120: The concept of peak-shaving is introduced but it is  
882 not clear what the procedure entails. Please provide a brief description.

883 We added a definition of the term peak shaving as printed in Sect. 2.1.

884 The transition between the operating modes introduces a new control region since  
885 the switching of the TSR is not a sudden change rather than a continuous reduction  
886 in TSR. In this paper, it is realized with a constant rotational speed (rpm) in region 2.2  
887 as shown in Fig. 2. The reduction in TSR alone (with a constant rpm) is not enough to  
888 limit the loads. On the contrary, it is part of the design methodology to combine  
889 pitching to feather and a reduction in TSR for load limitation as further analysed in  
890 Sec. 3.1. Consequently, the so-called strong wind mode cannot be described with a  
891 constant pitch angle. With increasing wind speed the pitch angle is gradually increased

892 towards feather to limit the flapwise RBM. This action will be referred to as peak-  
893 shaving in the following.

894 4. Please comment on how peak shaving influences the design of the blade.  
895 Reading though the manuscript, it feels like a control strategy and not  
896 something influencing the aerodynamic design of the rotor.

897 We carried out an additional study and applied the *Hybrid-Lambda* control strategy to  
898 a conventionally scaled blade. This breaks up to what extend the benefits result from  
899 the adjusted control strategies and to what extend they result from the adjusted blade  
900 design. In fact, they go hand in hand. A major part results from the control  
901 optimization and the TSR will be reduced over a wide range of wind speeds. Thus, it  
902 makes sense to account for that fact in the blade design. We added the results to Fig. 9  
903 and added a descriptive paragraph:

904 The green dashed line indicates the power curve of the reference blade that is  
905 geometrically scaled by the same factor and conventional peak shaving is applied to  
906 limit the flapwise RBM. This means only the pitch angle is set to a higher value to  
907 constrain the flapwise RBM while the rpm follows the design TSR. In contrast, the black  
908 dotted line represents the same blade (geometrically scaled IEA 15 MW) but peak  
909 shaving is applied in a similar manner as for the Hybrid-Lambda Rotor. This means  
910 for  $v > v_{shift,start}$  the rpm is kept constant until the operational TSR is reduced from 9  
911 to 7. For  $v > v_{shift,end}$  the rpm schedule follows the TSR of 7 which is an arbitrary  
912 choice in this case and should be optimized in a detailed design study. In addition, the  
913 pitch angle is set for  $v > v_{shift,start}$  in order to limit the flapwise RBM. In short, we are  
914 applying the Hybrid-Lambda control strategy to a conventional blade design. The  
915 results show that the power output can be greatly increased if the TSR is lowered in  
916 region 2.2 and 2.3 (compare green dashed and black dotted line in Fig. 9). Thus, peak  
917 shaving should not only be accomplished by increasing the pitch angle, but also by  
918 optimizing the operational TSR with respect to the load constraint (as also indicated  
919 by Madsen et al. (2020)). Since the results show that a reduction of the operational  
920 TSR is beneficial in the peak shaving region it makes sense to account for this fact  
921 already in the blade design which is integrated in the Hybrid-Lambda design  
922 methodology. Indeed, the Hybrid-Lambda Rotor enables even lower power losses in  
923 the peak shaving region since the TSR reduction is already accounted for in the blade  
924 design (compare solid red and dotted black line in Fig. 9). The turbine concept reaches  
925 its rated power at  $10.2 \text{ m s}^{-1}$ , which is  $0.4 \text{ m s}^{-1}$  lower than the reference turbine.

926 5. Section 2.3: In this section the free variables are defined as chord, twist, radial  
927 airfoil positions, and spar cap thickness. But in section 2.1, the transition  
928 position and rotor radius are also discussed as design variables. Please clarify  
929 in the manuscript which variables are set/pre-determined and which ones are  
930 free variables.



931 We clarified this by adding the type of variable (optimized, fixed...) to Table 2 and  
932 additionally provide a design flow chart in the revised manuscript which clarifies the  
933 design workflow.

934 The overall design and optimization workflow is illustrated in Fig. 3. The process can  
935 be explained in four steps: An aerodynamic blade optimization, an aero-structural  
936 optimization of the blade, a structural optimization of the tower and the aero-servo-  
937 elastic simulations. In the first step (aerodynamic optimization), the design variables  
938 are the transition point between the inner and outer blade section, the design TSRs,  
939 the design axial induction factors, the twist offset and the design angle of attacks.  
940 Once a reasonable design is established the influence of the rotor radius is  
941 investigated. In the second step (the aero-structural optimization), the design  
942 variables are the airfoil positions and the spar cap thickness. When this step is  
943 converged the aerodynamic optimization is re-calculated once with the new airfoil  
944 positions. As a third step, the tower and monopile are optimized for a fixed rotor  
945 design. The resulting turbine design is then investigated in aero-servo-elastic  
946 simulations.

947 6. Section 2.3: The load case for the optimization is defined at a wind speed of  
948 6.9m/s, the following sentence on line 180-181 does not justify why this case  
949 was selected. If the rotor radius is a free parameter, then, the inflow for the  
950 load case is going to be a function of radius as the TSR is set to 11, this is  
951 confusing. How was this predetermined?

952 The operational parameters for the design load case are re-calculated for every design  
953 iteration in WISDEM (with the code changes applied by the authors). We added this  
954 description to the methodology:

955 For each iteration the schedule of rpm, pitch, power, thrust and flapwise RBM over  
956 wind speed is re-calculated. The considered load case for the constraints is a steady  
957 inflow at the strongest wind speed in the light wind mode  $v_{shift,start}$ , as calculated for  
958 each design iteration (in this case  $v = 6.9 \frac{m}{s}$ ,  $TSR = 11$ ,  $\beta = -0.8^\circ$ ).

959 7. Section 2.3, line 204: OpenFAST provides a large set of options in its  
960 aerodynamic module AeroDyn. Please elaborate on what aerodynamic options  
961 were used when carrying out the aero-elastic simulations. Was it the same as  
962 the reference wind turbine? This will help guide discussing the load  
963 comparisons.

964 We added this information to Sect. 2.3 and further plan to provide the simulation  
965 model of the *Hybrid-Lambda Rotor* once the manuscript is published. The aerodynamic  
966 model was chosen the same way for the reference turbine.

967 The aerodynamic modelling includes the effects of tower shadow and the  
968 aerodynamic loading on the tower, as well as the Minemna/Pierce dynamic stall  
969 model, as described by Damiani et al. (2019).

970 8. Section 3.1, line 216-217: It is not clear how the specific rating and rotor  
971 diameter is determined? Was it a design variable? If so, please define in Section  
972 2.2/2.3. If not, please clarify on how this was determined.

973 The influence of the rotor diameter is investigated in a subsequent design loop once  
974 an initial chord and twist distribution is established. This is also marked in the newly  
975 added design flow chart. The influence of the rotor diameter as a design variable is  
976 discussed in line 279 of the revised manuscript. To simplify the understanding, the  
977 concept can only be shown for one specific rotor diameter in the given paper. To  
978 clarify this, we classified the rotor diameter as a design variable in Table 2 and added  
979 an explanation to the beginning of Sect. 3.

980 In this chapter, we focus on the given use-case of the 15 MW offshore wind turbine,  
981 no longer generalizing the concept, in order to simplify the understanding. This means  
982 only one specific turbine diameter is presented here, although the influence of the  
983 rotor radius as a design variable was investigated and is further described below. We  
984 first address the resulting blade design and the influence of certain design variables.  
985 Table 2 summarizes general turbine parameters. The second part deals with loads,  
986 axial induction, angle of attack and power generation under steady and uniform  
987 inflow conditions. This is followed by the results of the structural design and the aero-  
988 servo-elastic investigations.

989 9. Section 3.1, line 221-222: I find it difficult to follow the need for the twist offset  
990 in the inner section of the blade. The discussion related to this in previous and  
991 future sections feel fragmented. Please try re-organizing and better explain the  
992 need for the twist offset.

993 Indeed, the arguments and explanations were fragmented over several sections. We  
994 re-organized the description of the aerodynamic behaviour and the change in the  
995 angle of attack distribution to bundle the arguments. We moved the description of  
996 the change of the inflow angle distribution due to the change in TSR (lines 338-353  
997 and Fig. 7), to Sect. 3.2 (next to Fig. 8). Like this, the description of inflow angle change  
998 and angle of attack distribution follow up on each other and are easier to understand.

999 Regarding the twist offset, we added a description to Sect. 2.1.

1000 Furthermore, we design the blade in a way that peak shaving is applied more  
1001 efficiently. The inner section is designed with a twist offset towards stall. This comes  
1002 with several advantages. The inner section does not operate in the design point in the  
1003 low wind regime. As it is twisted towards stall and operated at a higher TSR than it was  
1004 designed for, a fairly conventional induction factor of 0.33 can be reached, which leads  
1005 to an increase in the power coefficient in the low wind regime. The angle for the twist  
1006 offset is derived iteratively in stationary blade element momentum (BEM) simulations  
1007 to reach the desired axial induction factor of 0.33 in the inner section at the high TSR.  
1008 Using the twist instead of the chord length as a tool for this increase in the axial  
1009 induction factor allows to use smaller chord lengths which leads to more slender,  
1010 lighter and possibly cheaper blades. Hence, the twist offset defines the difference of

1011 the axial induction factor between the light and strong wind mode for the inner part  
1012 of the blade and it further influences the pitch angle at  $v_{shift,end}$  that is needed to limit  
1013 the loads. In fact, the pitch angle of  $2.2^\circ$  at  $v_{shift,end}$  almost perfectly counterbalances  
1014 the twist offset of  $-2.5^\circ$ . Hence, the inner part of the blade operates in it's optimal lift  
1015 to drag ratio at this wind speed, although the entire blade is already pitched to feather  
1016 for load reduction. When peak shaving is applied, pitching shifts the inner section to  
1017 operate at its aerodynamic optimum rather than moving away from it. It reaches its  
1018 design point (an induction factor of 0.21 at the low TSR), which is beneficial for load  
1019 reduction. In contrast, the outer section is now operated in a "pitched-to-feather-  
1020 condition" and is greatly relieved. The limits to this methodology are negative lift and  
1021 the stall angle. The latter is also plotted in Fig. 8.

1022 10. Section 3.1, line 254-269: This paragraph emphasis and extensively discusses  
1023 the rotor radius as a varying parameter, this leads the reader to believe that it  
1024 is a design parameter, but it has not been highlighted as such in Section 2.3.

1025 We classified the rotor diameter as a design variable in Table 2 and added an  
1026 explanation to the beginning of Sect. 3.

1027 In this chapter, we focus on the given use-case of the 15 MW offshore wind turbine,  
1028 no longer generalizing the concept, in order to simplify the understanding. This means  
1029 only one specific turbine diameter is presented here, although the influence of the  
1030 rotor radius as a design variable was investigated and is further described below. We  
1031 first address the resulting blade design and the influence of certain design variables.  
1032 Table 2 summarizes general turbine parameters. The second part deals with loads,  
1033 axial induction, angle of attack and power generation under steady and uniform  
1034 inflow conditions. This is followed by the results of the structural design and the aero-  
1035 servo-elastic investigations.

1036 11. Section 3.1, line 276: This is the first time the transition point for lambda is  
1037 presented as a design choice and not a free variable. There are a lot of variables  
1038 and moving parts in the optimization to follow. Presenting the  
1039 optimization/design workflow in a flow diagram would help guide the reader  
1040 through the whole optimization process better, in fact it will help the authors  
1041 be more clear in their discussion of the optimization process. Using XD<sup>SM</sup>  
1042 (eXtended Design Structure Matrix) might be a good approach.

1043 We thank the referee for the idea of visualizing the workflow in a design flow chart.  
1044 We included this in Sect. 2.1 and added a descriptive paragraph.

1045 The overall design and optimization workflow is illustrated in Fig. 3. The process can  
1046 be explained in four steps: An aerodynamic blade optimization, an aero-structural  
1047 optimization of the blade, a structural optimization of the tower and the aero-servo-  
1048 elastic simulations. In the first step (aerodynamic optimization) the design variables  
1049 are the transition point between the inner and outer blade section, the design TSRs,  
1050 the design axial induction factors, the twist offset and the design angle of attacks.  
1051 Once a reasonable design is established the influence of the rotor radius is

1052 investigated. In the second step (the aero-structural optimization) the design variables  
1053 are the airfoil positions and the spar cap thickness. When this step is converged the  
1054 aerodynamic optimization is re-calculated once with the new airfoil positions. As a  
1055 third step the tower and monopile are optimized for a fixed rotor design. The resulting  
1056 turbine design is then investigated in aero-servo-elastic simulations.

1057 12. Section 3.2, line 289: Presenting figure 6 in section 2.1, around line 125 would  
1058 help the readers better understand the unique speed and pitch schedule, and  
1059 peak shaving that is discussed extensively up until line 289.

1060 We moved Fig. 2 to Sect. 2.1, as suggested and added a description of the TSR-  
1061 transition.

1062 The transition between the operating modes introduces a new control region since  
1063 the switching of the TSR is not a sudden change rather than a continuous reduction  
1064 in TSR. In this paper, it is realized with a constant rotational speed (rpm) in region 2.2  
1065 as shown in Fig. 2. The reduction in TSR alone (with a constant rpm) is not enough to  
1066 limit the loads. On the contrary, it is part of the design methodology to combine  
1067 pitching to feather and a reduction in TSR for load limitation as further analysed in  
1068 Sec. 3.1. Consequently, the so-called strong wind mode cannot be described with a  
1069 constant pitch angle. With increasing wind speed the pitch angle is gradually increased  
1070 towards feather to limit the flapwise RBM. This action will be referred to as peak-  
1071 shaving in the following.

1072 13. Section 3.2: Please discuss the limitations of using BEM specifically for the  
1073 hybrid-lambda rotor. Given the step change in induction at the 70% blade span.  
1074 Does using higher fidelity method like free-vortex or CFD change the load  
1075 distribution near the 70% blade span?

1076 We used free-vortex wake methods to investigate to what extent the assumption of  
1077 independent blade elements in the BEM theory is violated. This is addressed in a  
1078 separate publication which is accepted but not published yet (Ribnitzky, Bortolotti,  
1079 Branlard, Kühn: *Rotor and wake aerodynamic analysis of the Hybrid-Lambda concept - an  
1080 offshore low-specific-rating rotor concept*, JoP conference series, 2023). The FVW  
1081 investigations support the design principles of the *Hybrid-Lambda Rotor* that were  
1082 originally identified using the BEM theory. The integrated rotor quantities (power and  
1083 thrust) are in very good agreement for the two methods. For the light-wind mode, the  
1084 aerodynamic power exactly matched, whereas the FVW code computed about 0.5%  
1085 higher thrust. For the strong-wind mode, the FVW code computed 1.5% higher power  
1086 and 0.75% higher thrust. For the radially resolved variables, discrepancies are most  
1087 distinct when the gradients along the blade span are large. In the light-wind mode,  
1088 differences of about 0.03 in the axial induction factor distribution are observed  
1089 between BEM and FVW. In the strong-wind mode, the deviations are less prominent,  
1090 as the gradients along the blade span are reduced. We included the citation in the  
1091 beginning of Sect. 3.2:

1092 Note, that due to the gradients along the blade span the assumptions made in the  
1093 BEM theory can reach their limit. We used free-vortex wake methods to investigate to  
1094 what extend the assumption of independent blade elements in the BEM theory is  
1095 violated. Results show good agreements for rotor integrated quantities (power and  
1096 thrust), although some differences are noticeable in the radius resolved variables  
1097 when the gradients along the blade span are large in the light wind mode. The  
1098 interested reader is referred to Ribnitzky et al. (2023).

1099 14. Section 3.3, Line 350: In addition to presenting the relative thickness and the  
1100 spar-cap thickness, it would be valuable to compare the flapwise and edgewise  
1101 stiffness, and mass distribution of the blade vs the IEA 15MW. The rapid  
1102 transition in stiffness at the 70% location of the blade will be a point of concern  
1103 especially for extreme loads. The optimization routine uses a steady inflow  
1104 condition at relatively low wind speeds (as discussed in Section 2.3) this will not  
1105 be representative of the stiffness distribution at the TSR transition region of the  
1106 blade.

1107 We added a plot, comparing the mass and stiffness distribution of the *Hybrid-Lambda*  
1108 blade and the IEA 15 MW:

1109 The resulting mass and stiffness distributions are compared to those of the IEA 15 MW  
1110 in Fig. 13, clearly showing the steeper gradient in the flapwise stiffness in the transition  
1111 area of the *Hybrid-Lambda* blade.

1112 15. Section 3.3, Line 361-362: Using an exponent of 3 for geometrically scaling the  
1113 reference blade for comparison is unfair. More recent publications (Griffith  
1114 2014, SNL100-03) have shown that the mass scaling exponent is realistically  
1115 between 2.1 to 2.5.

1116 We added a note with the suggested citation:

1117 Note, that the reference exponent of 3 is only derived by geometric considerations.  
1118 Griffith and Richards (2014) summarize recent trends for commercial and research  
1119 blades and state mass scaling exponents of 2.5 for moderately innovative blades and  
1120 2.1 for highly innovative designs.

1121 16. Section 3.3, Line 366: What is the tower design driver for the IEA 15MW turbine?  
1122 How does that contrast to the design driver for the current design? The  
1123 reduction in tower diameter from 10m to 8.54m is significant especially given  
1124 the 13% increase in blade mass (based on Line 362).

1125 The optimization algorithm reduced the tower diameter but increased the wall  
1126 thickness (as described in line 442) in order to meet the constraints for buckling,  
1127 maximum stress and eigenfrequencies. Furthermore, we increased the partial safety  
1128 factor for loads (see line 230), to account for the simplified load analysis. We further  
1129 want to point out that the thrust of the *Hybrid-Lambda* turbine is lower than for the  
1130 IEA 15 MW in all DLCs (as can be seen in Fig. 15). Nevertheless, the increased rotor-

1131 nacelle-assembly mass, the resulting dynamic loads and the storm loads will lead to a  
1132 challenging load set, that needs to be taken care of when deriving a sophisticated  
1133 tower design. We would like to focus on the rotor design in this paper and chose to  
1134 present a very simplified tower design. We added to line 223:

1135 As the main focus of this paper is the aerodynamic rotor concept, we only present a  
1136 preliminary tower design and the simple choice of a monopile foundation was made,  
1137 although...

1138 17. Section 3.4.1, Line 390: The equation is typically used for a constant  $C_p$  region.  
1139 Since this value is not unique for the hybrid-lambda rotor how is the generator  
1140 torque determined?

1141 We implemented the desired  $c_p$  value as a function of rotational speed which is  
1142 derived from steady state simulations. We added the dependency in the equation and  
1143 added:

1144 
$$M_g = \frac{\pi R^5 \rho c_p(\omega)}{2\lambda^3} \omega^2$$

1145 Note, that there is no unique  $c_p$  in region 2.3 since the pitch angle is a function of wind  
1146 speed. Hence, the desired  $c_p$  from steady state simulations is implemented as a  
1147 function of rotational speed.

1148 18. Section 3.4.2: Can you comment on the increased pitch activity due to the  
1149 newer controller as compared to the reference? This will be important when  
1150 determining the scaling of components (like pitch bearing/pitch actuator) costs  
1151 for the final cost function.

1152 In the initial manuscript, we missed to comment on the pitch activity and included a  
1153 statement in line 494:

1154 In this way, the amplitude of load variations can be drastically reduced and load  
1155 overshoots are less severe. Nevertheless, the increased pitch activity needs to be  
1156 considered when sizing the actuators and bearings which will influence the resulting  
1157 cost function.

1158 19. Section 3.4.3: Does 'quasi-steady loads' refer to the loads experienced by the  
1159 turbine due to steady inflow? If so please replace with 'steady state loads' or  
1160 'steady-inflow loads'.

1161 Yes, with quasi steady loads we want to describe the loads from simulations with  
1162 steady and uniform inflow, including elastic deformations of the structure. We  
1163 changed the wording to "steady-inflow loads" throughout the manuscript. If only rigid  
1164 structures are considered, this is additionally mentioned.

1165 20. Section 3.4.3, Line 504-505: In storm cases, it is not only the slenderness of the  
1166 blade that determines the load or reduction in loads. It is the complex

1167 interactions arising due to the blade geometrical twist, azimuthal angle, and  
1168 yaw error that determines the loading of the turbine. Attributing the lower  
1169 storm loads to planform area is assuming the inflow to the blades are primarily  
1170 in at 90-deg to the airfoils, this is far from the case.

1171 We do agree that this formulation was misleading, so we reformulated it.

1172 In the storm events, the slender blade design shows additional benefits. The shorter  
1173 chord length reduces the lift forces arising from the complex interaction of blade twist,  
1174 azimuthal position and yaw error.

1175 21. Section 3.5: Generally, any discussions regarding CapEx increases/decreases in  
1176 components other than blade/rotor and tower are neglected. It will add value  
1177 if the authors share why CapEx change of other components are significant (or  
1178 not) to COVE.

1179 We carried out an additional study on the component costs using the cost models  
1180 implemented in *WISDEM*. We added the description of the methodology to Sect. 2.3:

1181 The cost model implemented in *WISDEM* based on the work from Fingersh et al. (2006)  
1182 was used to create a breakdown of the costs of major wind turbine components. The  
1183 model includes a rather detailed estimation of the blade costs, as described by  
1184 Bortolotti et al. (2019), including assumptions for materials, labour, tooling and many  
1185 more aspects. On the contrary, the costs for parts like the pitch system and the hub  
1186 are implemented as simple functions of the rotor diameter or the blade mass. The  
1187 assumption of the direct drive generator costs was adjusted since the original model  
1188 only takes the machine rating as an input. In our case, the rated power remains  
1189 constant but the rated torque increases since the maximum rpm is reduced (constant  
1190 maximum blade tip speed). According to Fingersh et al. (2006), the generator mass  
1191 scales with  $M_{g,rated}^{0.606}$ , with  $M_{g,rated}$  being the rated generator torque. We accounted  
1192 for the mass increase in the cost estimation, assuming that the costs increase linear  
1193 with the mass. Overall, the cost model can serve to point out trends in the  
1194 development of costs when increasing the turbine size, but absolute values should be  
1195 handled with care.

1196 We added a new bar chart with the cost breakdown to Sect. 3.5 and described the  
1197 results:

1198 A breakdown of the costs for the most important turbine components is shown in  
1199 Fig. 21. Obviously, the largest increase in costs compared to the reference turbine is  
1200 seen for the blades, since this is the part that increased the most in terms of size and  
1201 complexity. In fact, the costs of a blade increased by a factor of 2.8 (equals  $n^{3.37}$ ).  
1202 Related to the much heavier blades and the increased aerodynamic loading also the  
1203 pitch system needs to be sized properly. Hence, the pitch system (plotted for all three  
1204 blades) sees the second highest increase with a factor of 1.8, compared to the  
1205 reference turbine. The tower costs increased by a factor of 1.2. The costs for the direct  
1206 drive generator have the largest share of the total turbine costs and the derived

1207 generator costs for the reference turbine are comparable with the findings of Barter  
1208 et al. (2023). For the *Hybrid-Lambda Rotor*, they increased by a factor of 1.22 since the  
1209 rated generator torque increased. These numbers should only indicate an  
1210 approximate trend of the cost breakdown, since the cost model in *WISDEM* relies on  
1211 simplified scaling rules coupled to empirical datasets. For more insights, sophisticated  
1212 models need to be set up for components like the pitch and yaw system or the  
1213 generator.

1214 22. Section 4: This section generally reads well.

1215 23. Section 4, 656: The authors contrast their work to that of Wobben, please  
1216 consider moving this discussion to the literature review to make a stronger  
1217 argument about the novelty of the Hybrid-Lambda rotor.

1218 We moved the description to the introduction, as proposed.

1219 This concept follows the objective of reducing unintended stall effects on the blade of  
1220 a variable-speed turbine in gusty winds. It was not used to enable large rotors with  
1221 low specific ratings, as pointed out with the *Hybrid-Lambda* concept.

1222 24. Section 4, 665-666: what does “way more than 100m length” mean in this  
1223 context? Is it a mis-phrased sentence?

1224 We re-phrased the sentence:

1225 Thus, we want to raise the question of whether controlling one degree in the angle of  
1226 attack is at all feasible in a real application of a blade with 158 m length.

1227 25. Section 4, 685-670: Yes, I strongly agree with the authors the value of  
1228 considering the torsional degree of freedom for the blade. Especially given its  
1229 slender nature. Consequently, the aero-elastic stability of the blade will be  
1230 interesting given how close to stall the inner part of the blade is at certain  
1231 operational conditions.

1232 We do agree with the referee. Unfortunately, we feel that considering blade torsion in  
1233 the analysis will only make sense in combination of a major redesign of the blade since  
1234 the torsional deflection needs to be accounted for in the blade design. Further, a full  
1235 aero-elastic stability analysis would go beyond the scope of this paper which aims on  
1236 providing the conceptual idea and the methodology to design very low-specific rating  
1237 wind turbines.

1238 26. Section 5, lines 710-712: After reading the paper it is not yet clear to me how  
1239 the peak-shaving is integrated into the design process of the rotor, or how the  
1240 aerodynamic parameters are influenced by it. The aforementioned flow  
1241 diagram for the design/optimization process will help guide the reader to this  
1242 conclusion.



1243 As suggested, we included the design flow chart in the revised manuscript. Further,  
1244 the additional study on applying the *Hybrid-Lambda* control strategies to a  
1245 conventionally scaled blade will provide more evidence that the peak shaving control  
1246 strategies and the changes in the blade design go hand in hand.

1247 Minor corrections:

1248 1. Line 157: Citation for Buhl might be missing.

1249 We added the respective citation:

1250 Buhl, L.: A New Empirical Relationship between Thrust Coefficient and Induction  
1251 Factor for the Turbulent Windmill State, National Renewable Energy Laboratory,  
1252 NREL/TP-500-36834, 2005.

1253 2. Line 170: The source code ..... as described in the following (sections).

1254 We changed the wording:

1255 ... as described here.

1256 3. Line 201: Typo, 'planed'

1257 We corrected the typo.

1258 4. Section 3 title: 'Design and optimization of the blade structure'?

1259 Section 3 covers all the results and the following subsections:

- 1260 • Aerodynamic blade design
- 1261 • Aerodynamics, loads and power under steady-inflow BEM simulations
- 1262 • Optimization of the structural blade and tower design
- 1263 • Aeroelastic load simulations
- 1264 • Techno-economic evaluation

1265 We therefore would like to keep the very generalized heading of "Results" for Sect. 3.

1266 5. Line 451: avoid using the word 'slight' when discussing quantitative values like  
1267 RBM.

1268 We replaced the word "slight" with "minor" or "marginally" throughout the manuscript.

1269 6. Line 593: 'Figure' is used to reference figure 17, whereas in the previous  
1270 sections 'Fig. XX' has been used. Please maintain consistency.

1271 We follow the author guidelines for WES journal papers as further described in the  
1272 respond to the first reviewer (first comment in “technical corrections”). Figure and  
1273 Section are not abbreviated if it comes at the beginning of a sentence.

1274 7. Line 599: ‘Sect. 1’ is used to refer to a Section, whereas ‘Sec. XX’ was used  
1275 previously. It is clear that different authors have contributed to the sections,  
1276 hence the change in style, but please maintain constancy throughout the  
1277 manuscript as it is a single body of work.

1278 We replaced the abbreviation “Sec.” with “Sect.” to follow the author guidelines for  
1279 WES journal papers.

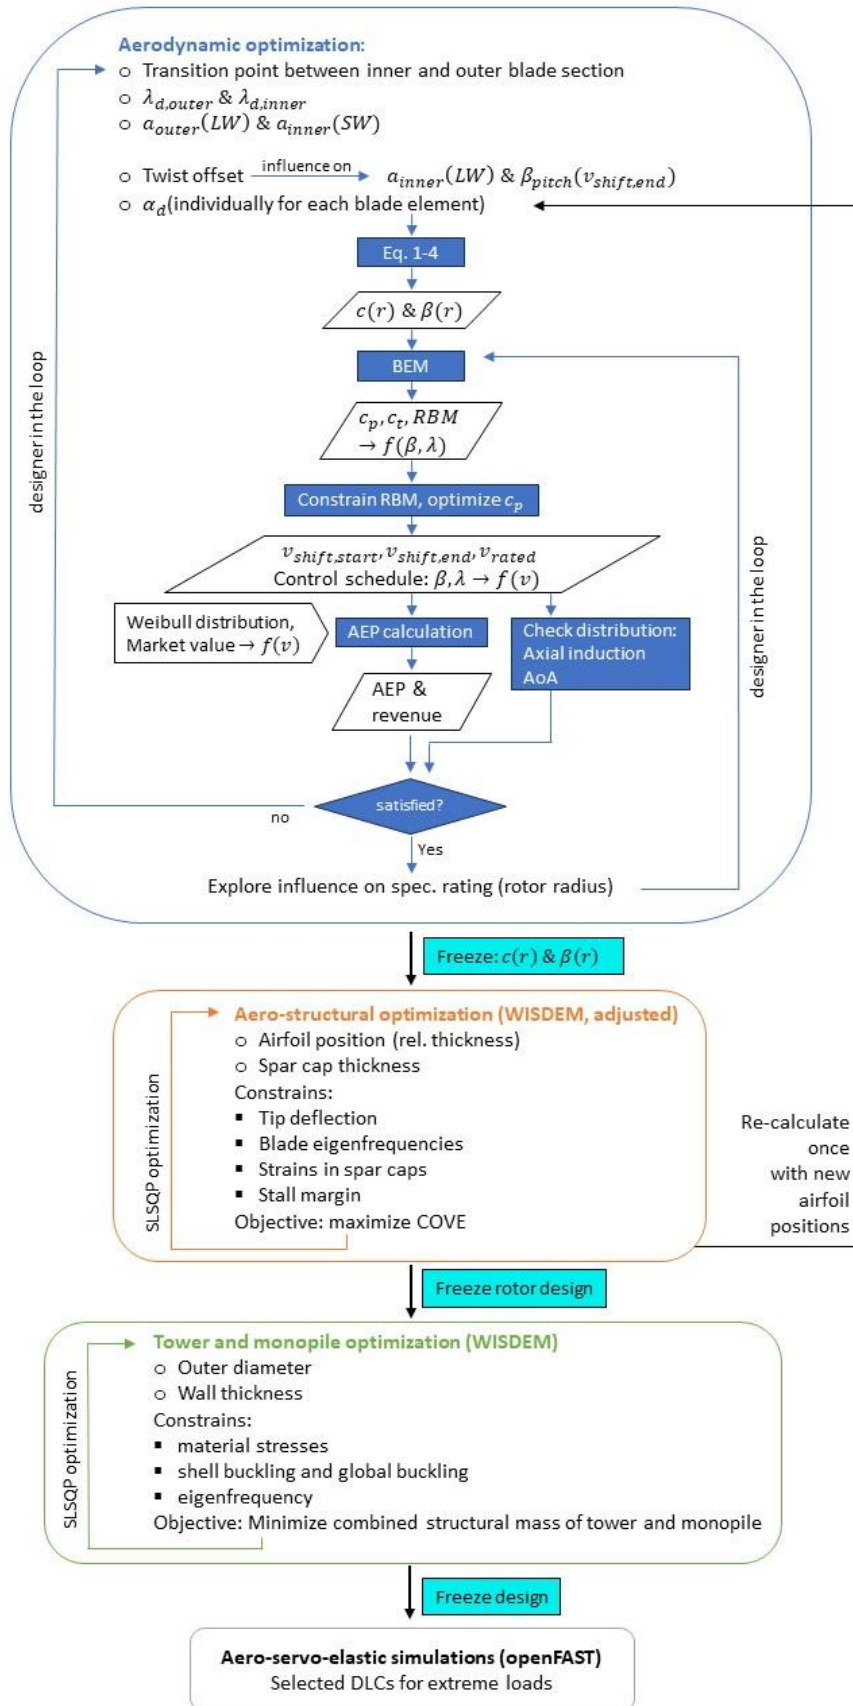

1281

1282

1283

**Figure 3:** Design and optimization work flow of the *Hybrid-Lambda* concept, round bullet points: Free design variables, squared bullet points: Constraints, diamonds: Outputs,  $f(\dots)$  : As a function of (...), LW: Light wind, SW: Strong wind

1284

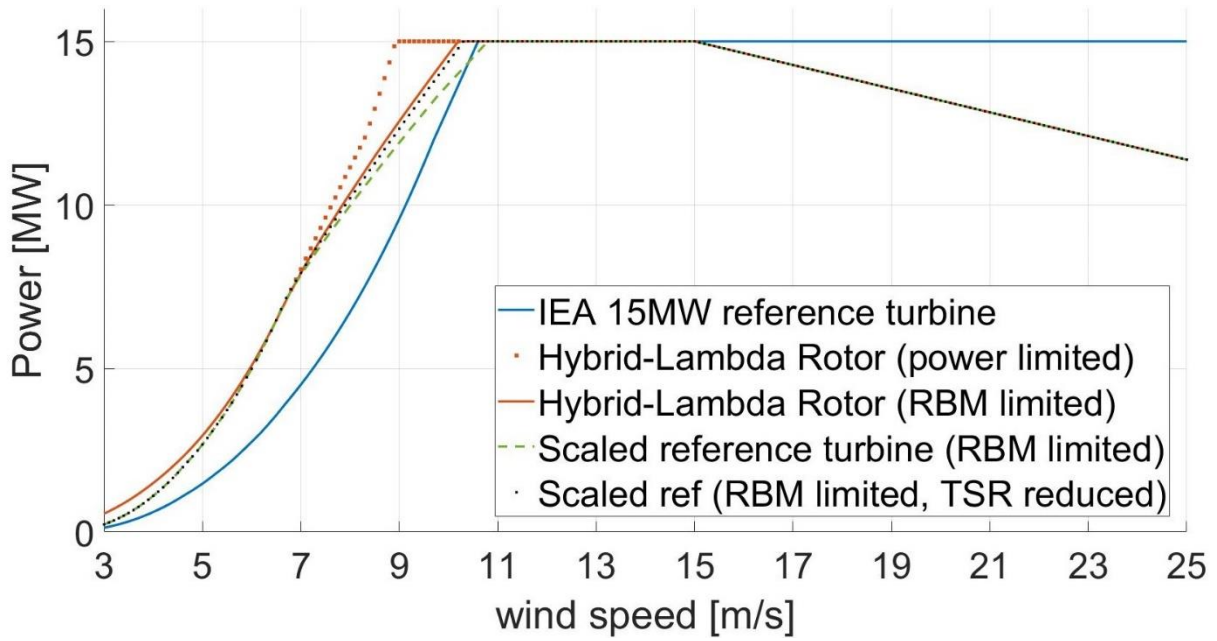

1285

1286

1287

Figure 9: Power output of the *Hybrid-Lambda Rotor* (solid red) compared to the reference turbine (blue) and a scaled reference turbine (dashed green and dotted black)

1288

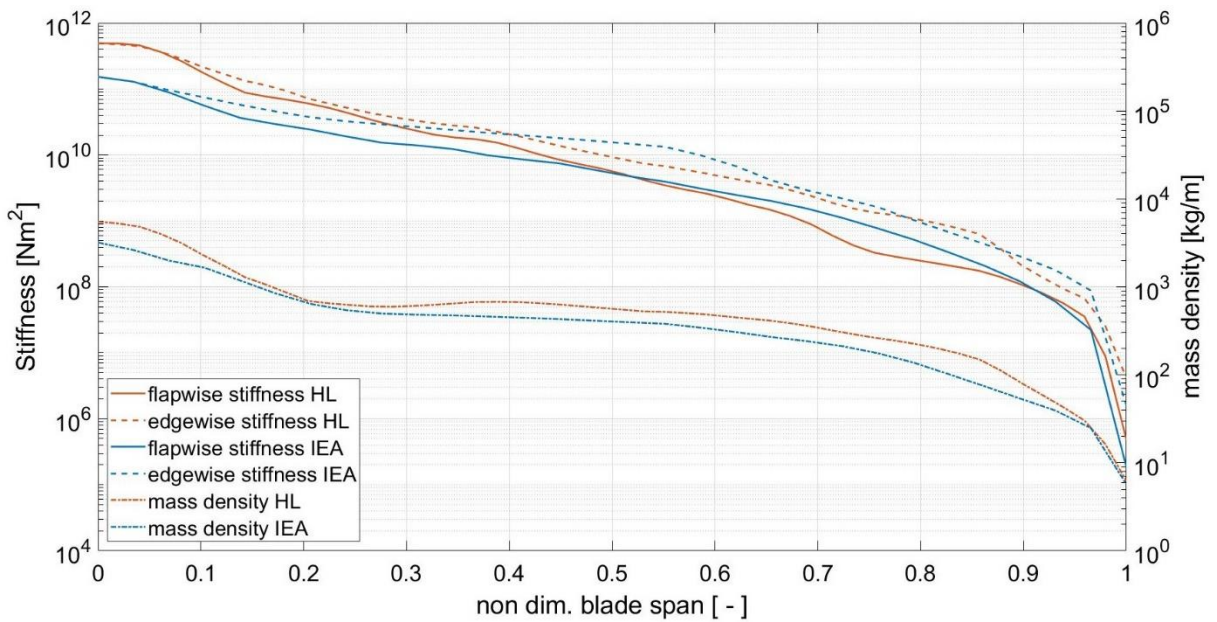

1289

1290

Figure 13: Mass and stiffness distribution for the *optimized Hybrid-Lambda blade* (red) and the IEA 15 MW (blue)

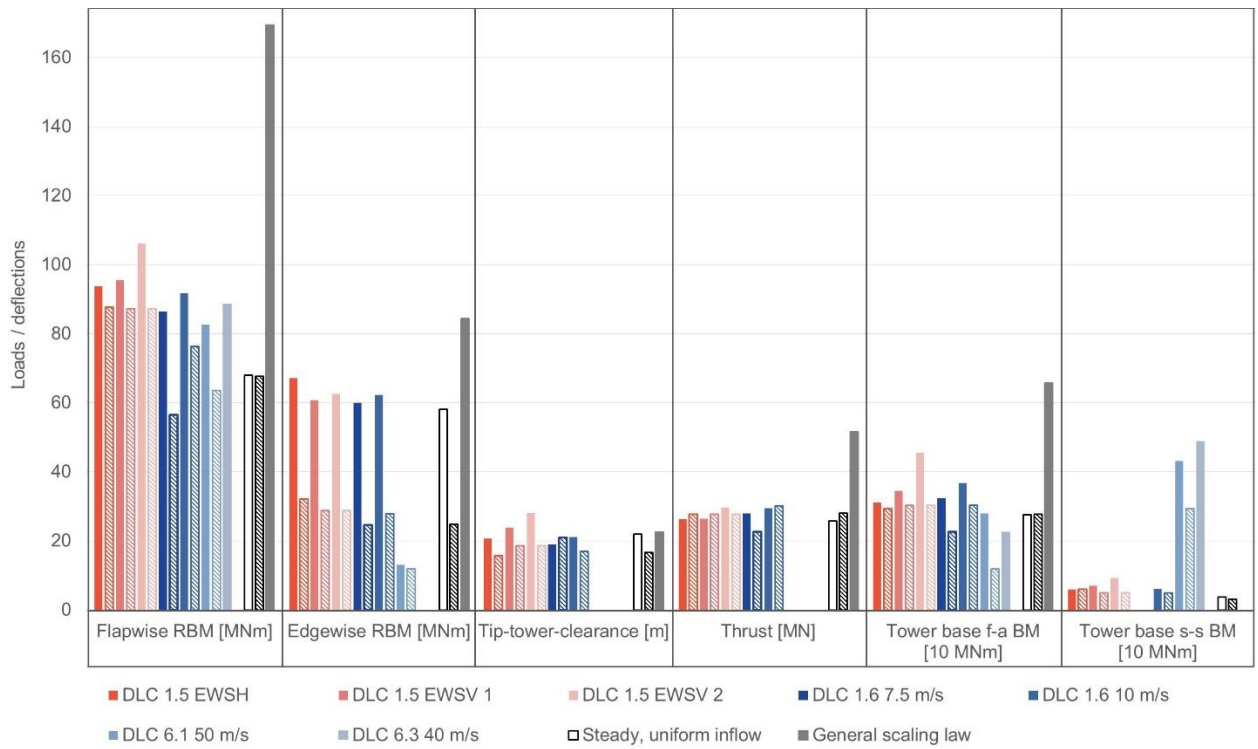

1291

1292

1293

1294

**Figure 15:** Ultimate loads in solid bars for the *Hybrid-Lambda Rotor* and in hatched bars for the IEA 15 MW reference turbine, only critical loads are displayed, EWSH = extreme wind shear horizontal, EWSV = extreme wind shear vertical, f-a BM = fore-aft bending moment, s-s BM = side-side bending moment

1295

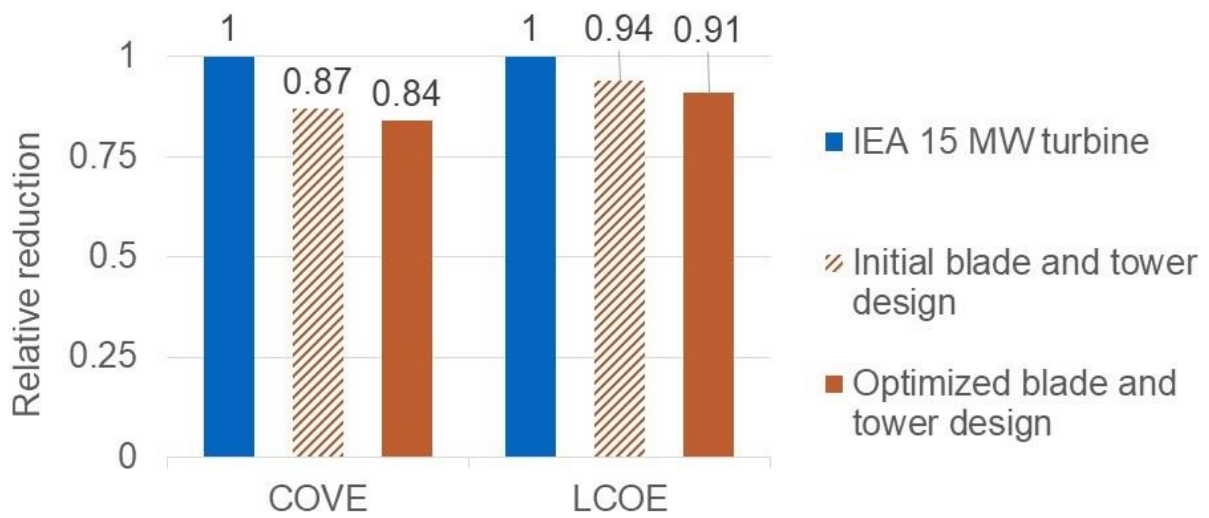

1296

1297

1298

**Figure 20:** Reduction in cost of valued energy and LCOE relative to the reference turbine for the cluster-wake affected wind speed distribution

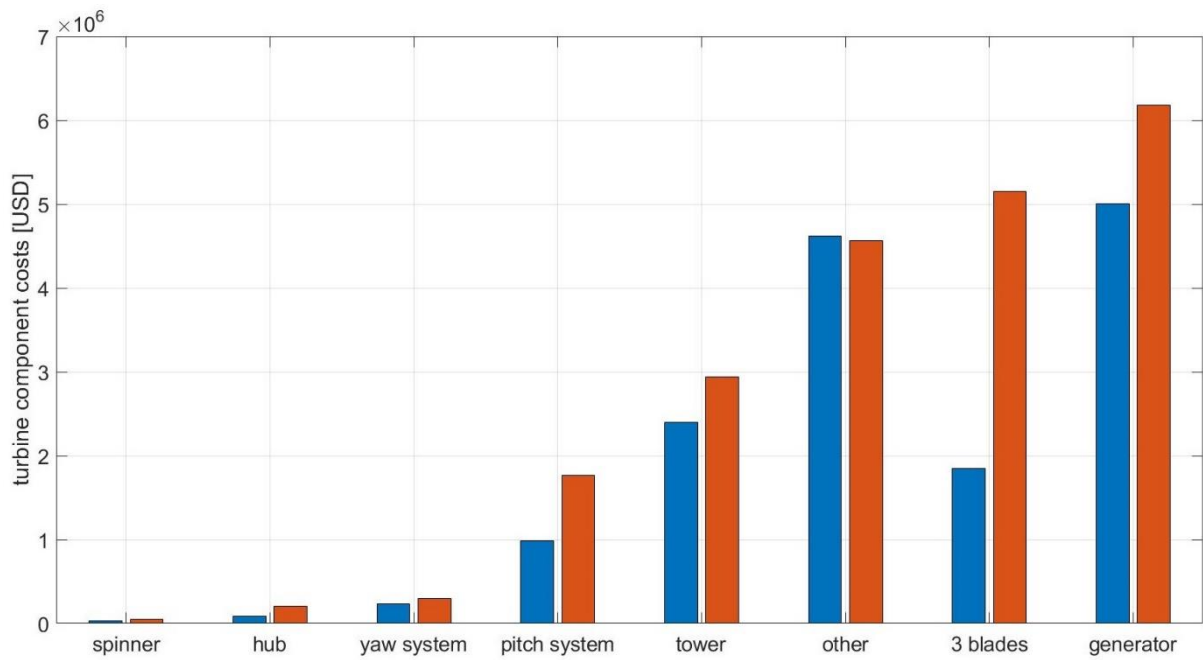

1299

1300 **Figure 21:** Estimation of turbine component costs for the IEA 15 MW (blue) and the optimized *Hybrid-Lambda* turbine (red)

1301

1302 **References:**

1303 Burton, T., Jenkins, N., Sharpe, D., and Bossanyi, E.: Wind Energy Handbook, Wiley,  
 1304 Chichester, 2nd edn., 2011.

1305 *Further references mentioned in the blue citations can be found in the revised manuscript.*
